# Supplementary material for: Discovery of anti-enterococcal phage lysins from environmental metagenomes using protein embedding-based classification
Source: Research Square preprint supplement (doi:10.21203/rs.3.rs-8328502/v1), 2025-12-11
Supplement: Supplementary file 1 [file c72e7c2891d404f07636f216.docx]

Supplementary Material

# Supplementary Tables

Supplementary Table . Classification of functional domains in lysins based on a framework proposed by Criel et al [1]. Domains were annotated and categorized according to their domain accession number into cell wall-binding domains (CBDs) and enzymatically active domains (EADs), comprising thirteen CBD clusters and twenty-six EAD clusters. EADs were further grouped based on their enzymatic activity. NA: not applicable.

| **Type** | **Enzymatic Activity** | **Domain Cluster Name** | **Domain Accessions** |
| --- | --- | --- | --- |
| EAD | N-acetylmuramoyl-L-alanine amidase | Ami_2 | SM00644, SM00701, cd06583, PF01510 |
| Ami_3 | SM00646, cd02696, PF01520 |
| Ami_5 | PF05382 |
| EAD | N-acetylmuramoyl-L-alanine amidase and peptidase | CHAP | PF05257, PS50911 |
| NLPC_P60 | PF00877 |
| EAD | peptidase | PET_M15 | cd14814, cd14852, PF02557, cd14849, cd14844, PF08291, cd14845, PF13539 |
| PET_M23 | PF01551 |
| PET_C39 | PF13529 |
| PET_U40 | PF10464 |
| PET_C70 | PF12385 |
| YkuD | PF10908, cd16913, PF03734 |
| EAD | N-acetyl-β-D-glucosaminidase | GLUCO | PF01832, SM00047 |
| EAD | N-acetyl-β-D-muramidase | GH24 | cd00737, cd00736, cd16900, cd16901, PF00959, cd00735 |
| GH19 | cd00325, PF00182 |
| GH25 | cd00599, cd06417, cd06415, cd06414, cd06525, PF01183, SM00641, cd06522, cd06523 |
| GH108 | cd13926, PF05838 |
| MUR | PF11860 |
| DUF1906 | PF08924 |
| GH46 | cd00978, PF01374 |
| Pesticin_C | cd16902, PF16754 |
| GPW_gp25 | PF04965 |
| Pesticin_lyz_like2 | cd16904 |
| EAD | N-acetyl-β-D-muramidase, lytic transglycosylase | SLT_related | PS51348, cd16899, PF00062, cd13399, cd16896, PF01464, cd00254, cd13401, cd01021, cd16893, cd16894, cd13400, cd13403, cd13925, PF06737, cd13402, PF18013 |
| LT_GEWL_like | cd16891, PF13702 |
| EAD | lytic transglycosylase | Hydro_2 | PF07486 |
| DPBB_1 | PF03330 |
| CBD | NA | CBD_PlyG | PF12123 |
| CW_7 | PF08230, SM01095 |
| CW_1 | PF01473, PS51170 |
| DUF3597 | PF12200 |
| LGFP | PF08310 |
| LysM | PF01476, cd00118, PS51782, SM00257 |
| PG_1 | PF01471 |
| PG_3 | PF09374 |
| PSA_CBD | PF18341 |
| SH3 | PF08239, PF08460, PS51781, SM00287 |
| SLH | PS51272, PF00395 |
| SPOR | PF05036, PS51724 |
| ZoocinA_TRD | PF16775 |

Supplementary Table DNA sequences of the 21 selected lysins as ordered for commercial DNA synthesis (Twist Biosciences). Each sequence contains a flanking BsaI recognition site (bold) at each side of the sequence (pointing inwards). BsaI restriction generates two sticky ends, one complementary with the start position marker (underlined) of the vector at the 5’-end, and one complementary with position marker 3 (underlined) at the 3’ end of the vector, enabling Type IIs cloning with BsaI

| Name | Sequence |
| --- | --- |
| E_24 | TGT**GGTCTC**ACCATGATGACCAGACGCATCGTGGTCGGCATGCATCACATTAATGTGACCCAGTGTCAGTTTTGTCCAACGGGTTTGTCACACAAATATATACCAGCTGTTGACTTAGCAGGAGAGGATACTGGCATGGACTACTGGCGGGCCATGGACGGTGCATATAAATGTATTGGGACGTGGGGCACCGCTCACGGCACCGCGTTTGCTCCAATTGATAGCAACGGAAACTACGAAATGACTGAGTTGGCCGATGGTACGATCCGCTACCTGGCAATTTACCTGGTTCATGATAATAACGCCCACAAAGTCGGCACTGTTATTCCTAAAGGAGAAGTTATGTATACCGAAGGCTCTTACGCTAACGGCAAAACAGGTCAGGTTGGCAATCACATCCATTGTGAAGCATTTGTTTTCGATCCAAACGACATCAAATTGGATCGTATCCAAGCGCAGGATGGCCAGTGGTACTTTAGAAATTATATAGAACCGTCTGAACTTTGGATTGCTACGGACTACTCGACAATCGTGGCGCTCAATGGTCAGAACTTTGGGCGGACTATATTAGCGGATACACAGCCTGATATACCTGTGACCCCAACTCCCGAACCGAGCAACCCCACAACAAGCAACTTCACCCAGATAAATGCGCAGGGTGGAAGCAATTCACTGCGCGACGTAACAACAAGCTTTCACGTTTATGCAAAGAATAACACAGTTCCGTCGATGGAAGTAGTGAAACAGACATATGAAGGAAGTGACATTTATGCACTGAAGATTAAGCTGGACGAAAATACAGTTCTTCTTAACGATTATCGTCCCGATGGGTGTGCAGTTGAGAATGCCACAAACGATTACATGATCAACCACGACTACTATGAGGTGGCAGCCTGGAATGGGGGCTACTTCGAGATGTCTGGCACTAACGTGCATAAGCCTGTAGGGGCCGTATTAACGGATTGGAGCGGCGCCTGGGCCAAATATAAAACCGACGATTGTGTGCCAGCTGCTAATAATGGGTACCCAACGTTAGCTTGGGATGACAGTAAAATGTCGTTACTGAACCTGAATGCTGACCAAATCGACACAAAAGCGTATCACTGGTTAAATGGAGTTGGACAGTCTGAGGTTATTGATTACAAAGTTAATTGCGGAATTGGCAGCGAAAATGGGCGTTATTACCAGAAGAACATGTGCATGAGCATGGGTTTTGATTCTAAAACCAATACGGTTATTGCGATGCTGAACATTACCGCAGGCCTGGATACACTGCAAAAAGCGTACGTTATGCAGGGTCTTGGGTGCGAATTAGGGGTGCAGCTGGACGGGGGAAATAGTTCACTCTTACGTTATAGAAATGACCTGCAGTCAAACGATGAGGAAAAAGCACTGGATACCCAAATTGCTCAACTGCAGGCTAACGTAGCATCGTTAACTGAGCAAAAAGGCAAATATACCACCGCGATAGAGACCGCCTCCAATACTCTTAAAAATGCGCTTGGAAGC**GAGACC**TGT |
| E_25 | TGT**GGTCTC**ACCATGATGCCATCTTACAAGACTTATACTACTGAACAGTACACGAGCTTTCTGAAAAACAGCACCAGTAACAACTTTGGGTTTTCTGATGACAAGCTTGCCGATTGGTTTATGGCACAGGCTGGCTCTATTCCCGTTATAACATCTTATGGCGTGACCAAAGAGAATCTGCTGAGCACGTACATACCGAAAATTAAGGAGTACCAAGGTGAAGCTGCGTTCTTTCTTTTCTATACTGTAACCGAAGGCGGAGGGGCCGGTAACTGGATTAACCACTATCAGAATGATACCAGCTCTACCGGTCTGGGCTGTTTGATCGATGACCTGGAATACTGTAAATCTATAGATGATAATTACCCCGGCTACCCCGTCGCTATGACGGCCCAAGAAGTAGCCGGAATACCCCCGCAGGAGAACATCAATCAGGCACAACAGGTCTATCGTGAATGTGGAAAGGGGACGATTGGGTCCATTATGATGCCCAGCACAATGGCGGGTAACGCATGGGTGTTCGCTGAAAATTGGTGTCTGGAGAACCAGGGTCCCCGTCCTGGTGTATATTTTGGGAATCCGTATGATCTCATGATTAAAACTATCCAGTCTTCGGGAGCGGATCCTTTTGGGGGGGGGTCCGGTGGTGGCGGTGGCGGTTCAATTGATGAGGGGTTGCCTGGCAATAATGCTCCGACGCAGACGACCCCCACAGTCGATACGTCACAGCTGATCACAGCTTTTGAGGCACTCACCAAAGTAATTAAAGAGCAGATTGAAAAGCTTAAAGACGTTAGCGATTCAAACGTATACCCATTATCATTGAACAAAATGTATCAAGCGAACAAATATTATAAGTTAACTAAAATGATGAATCTGACCCGGGTGACCCTGTCACGTGAAATTCTCGATGACATCATTAAGACGATTCAGGACGCTGTCTCAAATGCCGAAAATGCAGCGCAGGACCTCCAACCATCAAACAAAAACGAGAACGTTGATACTAACCCTCCAGAGCCTCCGGCGGGGGGGGGTGGCTCCGGCGAGACATCTGAGCTTGAGAATTACATTAACAAAGCCATCGCCCATATGAAGGATCTCCAGGACCGCGGGTTCACTTACAGTATGGATGCTAGATGGGGCGCGACGAGCCGAGATTGCAGTAGCGCTGTTTGTGAATCATATAATCTGGGAAATGGCAATACTGTCACCATGGATAGTACCCAACTGCCAAACCATGGCTTCGAAAAAGTCGTTGATAATCCTTATATGGCAGATGGTTGGAGCGCCCAGCGTGGTGATGTCTTTATTTTATATCCAAACGGGTCCACCCCCGCGGCAAGCGCCGGAGCAGCGGGGCACACAGGCATATTCATCGACAATGTAAACATTATCCATATGAATTATGCTAGTAATGGTGTGTCGATCGACCATTGTGCTAACGTTTTCAGCAGCTATTATGGACTTAACGTATGGCGCCCAACTCGTGCGAACGGAAGC**GAGACC**TGT |
| E_28 | TGA**GGTCTC**ACCCATGATGCTTGATGCCATCCAGAAGACCTTGATCGGCTTTGGCATATATGCCATCTTGGTACTGGTTTATACTCTCATCGGCTATCAGACAAATCTCAATATTTGGGCAGTTAAATGGGATTGGAAAAAGTGGGCAAACGGATTAGTCAAGTACTTGTTATACGGCGTAGAAGGGGTGTTAATGACAATGTGTGCTTATCTGTTAGTGGTTAAAATGCCTGACTGGGGGATCCAGGCGAGCAATGTAGAACAGATCTCGGTCAATGTAATTTGGGCTATAACAGCTTCTGCGAGCGTTGCAATGCTGGCCAAATGCATTAGAAAATGGGCGACTTCAATTGGTTTAACGGACGAAATGATCCTGCAACTGCAGCAGAGCGCAATAGACAACGCAGACGACGACCACATTATTGAGCTTAACCTGAATGAATTAAACGATCTGATGCCGAATGATTATGTCGCGAAACATAAAGAGTGGGAAGAACAGGCTGAAAAGGAGGGCGGTGTGGGCTCCCATTATACCGTCCCTTACGATACATACTCGCACTTTAAGAGTTCAGTTCTTAATCGCGGATATGATATAGACAATGCGTTTGGATATCAATGCTGGGATGGTGCATCGCTGCTGTGGCAGCAGATGGGGCTTACGCTTTGGACTGGCAATGGGAAAGCAATAGGGTGTTGGGATCTGAAACGCGAAGTCAATAAGTACGATAAGTTCGACCTTATTTATAATGTGAACGACCTCAAGATTGGAGACGTCGTCTGCATGCGACCAAACCATATAGGTTTTTTTGATGGGTGGAACGGAAACTACATGCGTATCCTCGGTCAGAATCAGGGCGGCACCCCAAAGAGCCCCAAAGGCGGAGCGGGGTTCAACATTGTGAATATAAACAAATCGAGTTTCGCAGGTGCATTTCGTTTTAAAGCGTGGAATTTGCCTAGCCCTACCCCTACACCTACTCCAACGCCTAAACCGTCCCATGAAGATCCTAATAAATTCAAAGTGGGTGACCTGGTAGAATTTGTAAACGCAGTAGACGTTAACGGCACCAGATTGGCTGTGAGCGGACAATATGCCGTCATGGAGATCTCAAATGGTTCGATAGTTGTTGGCCGAAACGGCGTCGTCACCGCCCGTGTGTGGGCTGAAAACATTAAGAAAGTTGGCAGCGCAATGAGTGGTAAAGTTAATGTTGGGGATATGTGCAAAACGACGGCAACCCATGATTGCCAAAGTGGGGTTGCCCTGAATCTGGCTATCGTGAACGACGGACAGTCCGTATTAATGGAGATCAACTCTAAGGGAAATGCAGTTTTGGGAAAGGGTGGTGTAGTCCGGTGCGCAGTACCGGTTGATTCACTGGTTAAAATTGGAAGC**GAGACC**TGT |
| E_31 | TGT**GGTCTC**ACCATGATGCTGAGTGGCGACAATACCGAGCAAGAGAGCTTGCTGCAAATGATCTGCGATGATGCAAACTACACCAAGTGGGTCAGCAGTGACGAATCTGACGTTGTAATCAGCGATTTCCAGTGTTCGTATTCAAATCTGCTGACAAACATCCAATTGTCGGATACCGGCTCACCTACCGTTCAGTTTATGGGAGGAATGGATACCCTGTACCATATTACCTTCGAAACAACAGATTATTCAGTGGTCCAGTCAATTGAACAGTGCCAAATTTCTAACGACGTTATGGTAAGAGAGAATATAAAATATCATTCTGTTGGCTTCGTGAAGTTAGAAAGTGAACTGGTTGAGTTCACTGGAAGCCTTTTCGTAATGATTGAAAACGTTACGACGAACACAGTTCCTGGATTTGCAGATCTGTATAACGTTCAAATTAGTTGTGTTTCATATGACATTGCACAGAGCGACCGGGAAAACCTGTCTGGATTCCTGCCGTTCGAATGCGATAAGTGCGGAACCAATAGTTTTGTGCCGGACCATATTCACGATGAGCAGGCAATCGGTCAGAATGAGAAAGGTCTGCGTAACAAAATCATGCAGGATAACTATGCGGAGTGGAAACTGCGTACCAGCGTTGAGGTCTATCCCGATCTGCATCTGCCAACCTATGCAGAGGTAGATGAATTTATCGGTAAGTGTGCCAGTTTTCGAGCCTCTAAAGGCTTAAACGGCCTGCCTTACAGTAACTATCCCACCGCACCGGTGAATATGCTCCACGGATCTAACCCAAATAATACCATTACTTTTGAAAGTACTGATGGAATCATAAACGCCTCGAGTATCGAGAGATCTTCACTGGAATACAATATTTTTGTAGATCCGGATTTCTATGTTTTCTACCCCTGCAGCTATGGTTCATTTGAGGAGGAAGCAAAAAAGGATGGTGAAGAATACTATAGCACCTATAAACCAAAACAGCGCGCAAGTTATACCAAGCAGAAAGTATACGAATCTTACCCCGATATTGAAGAGGCTGAGGCCGGCCAGTCAGGCATCGGGACGACCTCAACCGGATCTATGGCGGAACAATTCGTGACACTGGCCAACTCGTTCATAGGTCATAGCTATGTGTTAGGCACCGAAGGGGAAAATAGCGGCGCGGCCGGTGTTACCTTTGATTGTGCGGGCTTAGTACAGTACTGTCTTAAGGGTGTAGGCGCCGAACCGGCGGACGATGCGCCGTGGAACGTTCCGATACTTTGCATGCGAGTCGACCTGTTCGACGAAGTACCGTGGGAGTCGATGCAGCGTGGGGACATAATCACAACTTCATCACAGGGAAGC**GAGACC**TGT |
| E_46 | TGT**GGTCTC**ACCATGTCGGCCACCGTTCTGGGCCTGATGTTTGCCGGCAAAGCGAACGCCGCAACACGCGAGGAAGGCGTGGACGTGAGCAGTTACCAGGGTTCTTCTAGTTCCTATTTCAAAGCACTTAAAAACAAAGGAGCGAAATTTGTTATTGTTAAGGTGGGAGGTAGTGGTGGTGGCGAAGGGTATCATTATCAAAACCCCAGTGCATCAATGCAGCTGGCCAATGCAAAAGCTAATGGCTTGGCCGTTGGTGCGTATTTCTGGGCACAATGTGGCGCATCGAGTAGCGAAGCGCTCCGTATGGCGGATCAAGCTGTGAGTGATGCGAAGAAAGCGGGTCTGAAAACTGGTAGCGTTATAGCTATGGATTACGAAGCTGGCGCGTATTCTAGCCAAAAGACTGCCAATACGAACGCCGTAATCACGTTTATGGACTACATAAAGAAAGCTGGGTACAAGCCCCTTTTTTATAGCGGGGCCTCTTTCGCACGTTCTAATGTTGACACTAAAAAACTGGTTAATAAATATGGGAAAAGCGCCCTGTGGATTGCCTCTTATAAAACACTGGGCGCTCAGTATGCGCCGGATTACAACTATTTCCCTTCTATGGATGGTATTGGCATGTGGCAGTACGCTGATAACTGGAAAGGCTTTAATGTTGACGGTAACGTTCAGTTTGCAAAAATTATTTCAAATGGTAAAGTTGTCAAAAAAACACCGATTAAACAAGCCGATGCAACGACAAACAAGGAGAACGGGGTAAAGAAGTTACCCTCAAATAATACGTACACAGTGAAAAACGGTGATTCGTGGGCAAGCATTGCTAAGGCGTACGCAGTAGACGTCAATGGGCTGGCGAAACTGAATGGTGCCACAACGAAAACCATGCTTCGTCCTGGGGACAAACTGAAATTGACAGGCACTGTGCAAAACGTAGCAACGAAAAAACCGGCCAAAAAAATTGACGCTAAAAAAAAATCCGTAAAAAAAAACGAATGGGTCAAGAAGCGTGGCTTCTTCCGACTCAATACTACAATTAAACTCCGCTCTGGAGCAAGCACGAGCTCCAAAATGATATCGACACTCTACTCTGGGCAGTACATTAAATTCGACAGCTATCGCGTTGTGGGCAACTATGTGTGGTTACGCCAGAAACGCGTTAATGGATATGCATATCTGGCATCCGGCGAAGGAAGC**GAGACC**TGT |
| E_47 | TGT**GGTCTC**ACCATGGATGCCGAAAACGACGTGACGTTAGCGATGACTCATGAAAATGCTATTCCGTCGGATTGCACGTTAAACCACGTATACCATTCAGGGGATACTATTTATTATGAAGGCACTACCGGCAAAGCAACGGGCAATCATATCCATTTAGAAATTGGGAAGGGCTACCAGCCTAGCAAAGTAAAATTTTCGGGTGGTTGGAAACTCAACGACTGGATAAATATAGAAGATTATTTCTTCATTGACTCAGCCTACACGACTATAAAAGACGCCAAAGGAATAACTTTCTCTGAGTCTGAAGAAACGACAACAGCCACATTCATAGACGGATACCAACTGTTAAATTGGCAAGGCGCAATTGTACACGTATATAAGCAGAAGAAGAATCAAAAATTAGTGATGAAATCCGCGCAGCAAGCAGGCGTGGAGAATTACCGCGCGGTGCAGGATATAGCAGAACTTGCGATTGATACAGATTGCGCGATCAACTGCAACTATTTCGAAATGGCGAATCAGAGTATTTGCGGCACACATTATGGCGTGGAATTTTCTGACATAAATGAACTCGCTCCGAAACAGAACGAGTGGTTAGTGGCGTATGACCAAGGAGGCAAAATGCATTGGGCGGTATCAGATGAGTTTTGGCTGACCAAAGCGGACGCGCACGTTGCATTTTCCCCGGCAATTATCAACGTGGCAGAGGATATAAAAAATTGGCAGTATTCTCCCGCTTGCGGAACGGCGAAATACAGCAATAAAAATACGCAAACCCTGCTGATGCAGGATAAAGATGGCGTGTATTCATTTGCGGTTTTTAGCCAGATGGTCAATGGTAAACAGTGTACCGATTTCGCCAAAGCGTACAACCAGACCTTTGCTTGCATGCTCGATTCAGGTGGATCCTCACAGATGATAGCTGATGGCGAAAAGAAAGTTTATACAGGGCGAAAACTGCCAAATATTCTGGCGTTTGTCACCGTGCCGGACGAGGTACCTGAAGAAACTTTGCCAGAGCCGGATGCACCTAGTGTGACAGAAGATAATGGTACGGGGGGCACAACAACGGGTGGGAACGAAAATACACTGGGCAACGGTAGTAATGAAGCCACGGAATCTGTGATTATGAAACTGCTTAAGGCGTTGTATGAACTGTTGAAACAATTTTTCAATGGAAGC**GAGACC**TGT |
| E_58 | TGT**GGTCTC**ACCATGACAATCCTGAGCGGTCAGATCTATCGGTTTACGAACCGTGCTAAAAGTGTAACGTATCAAATGCCAACGCGTGCCGCAGAGGATTACTACGGTCGGCTTATCTTCACAACAAATGTTAATAGCAATCCTACGAAATATGTACAGCCAAATAATCTTTATTTACTCGGAGATGATTGCGTAAACGGGCAGCTTATCTTACAACCCGATACCACATATTCGATAACTATATATTATAACCCGAGTACGGAAATTAGCGACAAGTCGTACCTGGGTAGCGTAGCAGCCAAACATAATGGCGGGACGTATTCTCCATTTGGTAAATTTAAGGATGAAGAAGCGCTCGTAGCGATGGCCCAATCTTTCTATGATAACAAAGATAAGTTTGTGTATAATGGAACAACACCTTTTGACTTTACGAACCCAGCCAATCATGTGTATGAATGGACGACAGGTGACAAATTTAATATTGATAATCTGACCTTCATTTCCTATGTGCTCAGCGGCTGGAACTATTCGCAATCACATTACAATAATCAGACGAAGAGCAACGTTAATAAAAATAGTAAGTACTCTTGGGCTATTCCGGTGATGCGGAACAACGCGGAGATCGGGAAATATTTCGTTGAGAAGGGTTGGGTGCTGCATGGGGCCGATCTCGATACCTACACCAATATTAATCCAGGTGATATTATTTTCATGGATAGCGATAATGCGGATAATGGCAAATTTATGAGTATTTCTAAGGCCGTAATTGTGATTGGCACTGGCAGCGACGGAAAACTGCAGGCTATCGAATGCAGCGATAGTTCAAGTGTTTTCACGATTAAAAACGTCGAATCCTATACAAAATCGAATATTTTATTCATAGGGCGTATCCTGGTTTATGCTAGCTCCACACCGGCACCAAAGAATTATAATATTACTAGTACACTTACGAATTGTAAAATTAACAACTCAAAATCGACCGTTGAATCGGGACAGTCGTACTCTGCTGTCATCACGCCGAACGCTAATTACAAGATGGATCTGTATAACATTAAAGTAACGATGGATGGTGTTGATATCACAAAAAGCGTTGGAAGC**GAGACC**TGT |
| E_60 | TGT**GGTCTC**ACCATGATGAAAATAATCACCGCCATGGCCACACAAAATGATTGCTACAAAGCTGCCAAAAAAATGCCTCGGGGTCCGGAAGGTATTGTTGTTCATAGCACCGGAGCGAACAATCCTTACTTGAAGCGTTACGTTGACGCACCCGAAGAAGTGGGAAAGAACCAGTACGGAAACCATTGGAATCAGCCATCTAGTAAATTAGGACGTGAAGTATGTGTTCACGCCTTTATCGGTTATGCATTAAATAAAGAAGTCGCGGTGGCTCAGATTTTACCTTATGATATTTGTTGCTGGGGGGTGGGCTCAGGTAGTAAAGGCAGCTACAACTATGATCCGGCATACATACAATTTGAGATGTGTGAGGATGCCCTTACGAATGAAAAATACTTTAATACTATGATGAAGACTGCTCAGGAGTACTGTGCTATGCTGGTGAAACAGTATAATATACCAATCAAAAACATAGTGGGCCATTATGAAGCTTACAAACTGGGTTATGGTTCAAACCACGGTGACCCGTTAAACTGGCTGTCAAGATTTGGTAAAGACATGAATTGGTTTAGAGATGAGGTTGAAAAACTGGTTAAGGCGGCCGCTCCGACTCCAGTACAACCAACCCAGCCCGACAAACCAACGTCTCCCTCAAAAAAGCCGGCCGTTGGAGACATTGTTCAATTCGAGGGTGGGTATCATTATCGAAGTTCCAATGCGACGTCACCGACCGGTCAGAAACAAGCTCCGGGTCCGGCCAAAGTAACGGGATACTATCCAAAAGGCAAACACCCATATCATGTTGTGCACACCAACTCCAGATCTAATGTATATGGCTGGGTCGACGAAGAAACTATTATCGCGGAGGACACCTTTTATAAGTTTAAAGAAGGGGATAAAGTAAAAATCAAGGCAGGAGCTTCTTATTGGACGGGCATTACCGTTCCAGGCTGGGTCCAGAAGGACACGTGGATCGTTTATGAAGATCAGCCTGTGACCAGCGATAGAGTAGTAATTAACAAAAACGTCAGTGGCAAAAATGCGATTATGTCCCCTATTTCCGCCGAATTTCTCACTCTGGTTAAAGGAAGC**GAGACC**TGT |
| E_61 | TGT**GGTCTC**ACCATGATGGCAAATCTTTATATTAAAGGAGTGGATATCAGTGGCTACCAGCCCAATGTTGACTTTAATGCCGTTAAAAACGATGGTGTGGAAGTGTGCATTATTAAAGCAACGGAGTCTACAATCTATCCCAATAGTGCTTTCGACTATCAAGTGAACGGCTGTATAAGTAACGGTATAAACTTTGGATTTTATCATTTTTTTAGAGGGAAAGGCTATACCGAGGCGGATTACTTCTGTGATAAGATAGAGCCATATAAGGATATAATGAAAGTACTCCCGGTTATTGACGCTGAAATATTAACCGGCCATGAGGTCATTAATGGTGAACCTTATGAATATACCATCACCGATATAAATGAACAGGTACTGGCGTTCATAAACAGAGTTAAGGAGCGGTTGGGCCTGGATTGCATAATATATGCTGGCGCATATTTCTTGGGCGATAATCTGACCGACTATCGTCTGAAACAATTTCCTGTCTGGATTGCCCATTATGGTGTTGATTACCCTACGGTGCGCGGCATTTGGACAGACGATAACATCGTGGGACACCAATATAGCGAACAAGGGTACATTAACGGTATAGGCAATTGTGATGTTAATCGTTTTAACGAAAAAATATATATTGAAAAGAAAATTAAAAAAGAAAATGAAAAGTTAATTGGGGGCATTTATCGTATGGCCGGCAGCATCAATATGCGAGCTAAATATCGTGTGAATGGCGTGGACGTATGGACCAAATGGTACAATATGGACACGGAGTCTTGTACTCCGTATAAAAACATAATAGGGATCGAGATCTATACTGAACTGCCCTTGAAATGGGGCGTGTGTATGAACCAGAAATATATTAATGTAGAAGGTTCGGGAATTATCGAAGGTGCAGAAGTTTATGGATTTCAGGCCTACCTGACTGACCAATCTAAAAAAACATATTATTGGGTGTCAAGCCCTGGCGATGTGGCGGGGTTTGAATGGTGGGCAAATAACTGCCAAACCGAGAACGTCCCAGCTGTCTGCAAAAATTCTGGAGGCACAACCCCCCTGAACGCGGTAAAGCTGCGGTTAGGTGGAAGC**GAGACC**TGT |
| E_63 | TGT**GGTCTC**ACCATGCAAGCATCATCAACATACATTGTTACGGCAACGCCAGGGGTGGTGTACCAGGCAGTTAGTGAAGCTAATACTAGCTGGGCCGATGGGAACTTATCCTCTAACCGCCGGGCCATAACTGTTGAACATCACGGCGACTGGCGTAATGGTTATCGTAATGAAACCGTTATTCAGAATGCCGCACAACTTGTGGCCTGGCTTCGTGATCGTGGTATCGTGAATCATTATAAGAGACATCGTGAGGTATCCTCTGTGTACACCCTGTGTAGCGCTGACTTACCAGTAGAAGAGATATGGAATCGTGCCACACAAATCATAAATTCGAGCAACACGCCGACTCCTCCGCCTGTGACCAAGGCCGATTTAGTTTGGGAGAAACTCTCAAAACCGGTCACGTATGTTTTCAATAAACAAACAAACCTGTGGAACTTTAATGCAACTTCCCATGCTGGCATGACTTCGGTCAAGACCTTTGCCAAGGGTGACCGGGTCGACATCTATGGGAAGGTTACGAACAAAAGTGTGGGATCAGCGTATCTTCTGACAGAGTATTCTTATACTCAGAAAATCACCAATGGTTTTAACCAAGCGGATTTAGACGTCTATGTAGCACCGGCCCCAGTTCCCACCAAACCCGAATGGGAACGTAATCTGAAAGACATTGCTCCTGTAAAACTGCAGGTTTTAACGACGCAGACGCCAATTGTGAACCTCCTGGATGGTAGTATTGTTAAGCAGCTTGGCGGCGGTACTTGGGTTGATTTTGTTAAAACTACCACTGTGGGTGGCATAGAGTACCTGATCTCCAGTTGGTCCGCCGAACATGCCGTTGCAAACGGAATCAAACGCGCGGATGTGGGTGTCCCGGAAGCACCGGGGAATGAGAAACCGGAATGGCTGGAAAAGTGGTACGACATCGAAGACGTCGACATGTATACGAGAGCTGATACAGATCTGGTAAACTTAGAAGATGGTTCCACCGTGAAGATTATACCTCGTGGTGAGAAGATAAGAGTAGCTAGCATGACCGAGTGGTTTGGTCACAAATACGCAATTACGCAGGGAAGC**GAGACC**TGT |
| E_65 | TGT**GGTCTC**ACCATGAACAGCAACTGTAATAATGGCTCGCTCGTAAAGGCGGCAACGAAAAAATCCGGGTATGTTATGAAAAAGTTGACGTCGGTTACTATTAATGATCTGCTTCCTGGGGATCTTCTCATGATATCCAACGGGACGGTGCCTTCGAACTTAACGGTTTCATGGGCTTCGGCGCCGGATGGTAGCTCTCGCAAGGATAAAGGAACTCACCATGTCCTGGTCTATATGGGTAAAGAGAACGGTAACCGGATGATTGCGCATGCGAGTAATGGCTACTATTGGCCTCGTGCGATCCGGTATGAAAAGATGTTTGATTGCTATTCGAGTAATTATTGGTACACTCATGCTTTTATCCTGCGGCCGTGGGATTTAGCAAAATTAGATCGTGAGGCAAGTGACAACAAACCGGAAACCCCAAATAAACCGGAGACCCCTAGCAAAGAAGAATATCCGAATTGTTTTAATGAAACGGGTGTGAAAGATGGCAACAAGTATATTTACAAGTTCACCAAGTGTAAACTGACCGCCTACGGGAAAGATGCTGCCACAGCAAGCGGGCAGAAGCCTGTAGCGGGTAAAACGTGTGCCTGTCACAATATGCCTTATGGGACCAAAATTTATATACCCGCTTTGAAAGGCAAGTGTGGCAGTACCGGTATATTCACTTGTAACGATACCGGTGGTATGTGTTTTGATTTTGACCTTTTTCTTCACCAAACGTCTGATAAAGAGGCCGGACGTATATTATCCAAGACGGGCATTACGCGCGCCGATGTGTATGTCCTGGAATGGGGAACGGGTCGTATCGCCTCTAGCTTCACCGATATGGTTAAAGCTGTTGAGAAGTATGCCCCGCCTCTGTCTAAATATAAAACAGCCTGGGCCTCCTACTGGGAATATGGGGGCCAGACGATTAATTTTGCCAAGTTTCGCAACGACGACTTAGACATCAAGAACACGAAATATTGGGACCAGCTGAAAGGAAGC**GAGACC**TGT |
| E_72 | TGT**GGTCTC**ACCATGATGACCAAGATCATGACAAATTACGATTTAATCAATCGTATGAAAGAGTTACTTAACGAGCCAAATTACTATGGATCCGGCGGCAGCAATTGGAGCTCGTTTATCAACGGGAGTTGGTATGTGGATTGCACGTGCTCAATAAAGGCAATCCTGTGGGGTGGACGCTTCATAAAAGAAAACCGTGGCAAGCCGCATGCCGGATGTAATTATCTCAGCAACGGCGTGCCAGACTTCACCCCATCATCTTGCGTCGCGTGGACCAACGCCACCAAAGGAAATTTTAAAACTCTGGTCCCTGGGGAGATCCTGCTTATGACGAGCCAGGGACATGCCGGTCTCTATATCGGTAACGGGCAGGTTATTGAAGTGACCCCTGCCTGGACGGGAGGCAACCCAGGTTGCCAGATTAGTCAGATTGGCGTTAATGGCGAGCGGATTAAAAATGGGCGTCAGGTTCTGTCCTGGGAGTATCATTCGAAAATCCCCGTGATTGATTATGTTAGCCCAACCCCCAAGCCTGAGCCAAGCGTGCCGACCCCGAAGTACAAAGTCGGTGACAAAGTGATTATCGATGGACAACTGTACGGTACCGCTGATGGGGGAAATCCGGGACAAATTGTACATAACAAAATTACAACGATTACTCGTGTTGCCACGGGTCATCTGTACCCTTACAACACCACTTGCGATTTAGGCTGGATGGCCGAGGCGTGCATTACACCTTATAAAGAGTCCACAACTCTTCAGGTGGGCGATACAGTAAAAATTATGTCAACCGGCAACGGCAGCTCATATGGTGATTCTAATACCGCGTATGGCATTGGTTGGACGCGTAAAATATTAAACATATACAAAGGGCGTAGTTATCCGAATCAAGTTGGGGATGAAACCGGGACCACCGGTTTTTACAAAGATGACGCCCTTCAAAAATTGGGAAGC**GAGACC**TGT |
| E_76 | TGT**GGTCTC**ACCATGATGGCCTACTTATTGAAGAATGTCAAGAATCATGTACTGGCAAGCAAACAGGAATATTGTACATGGGACTATGGCACACGCGAACCGGATTACGCAGACCACCACGGGATCGACCTTATTAATAACGCTGGAGGATCTTGTGATGTTATCGCTATAGCTGACGGTGAGGTAGTGTACGTACAAGACGGTGTGCCCGGGCACGACGAGAAAGTTTACACTGCCGGCAACTTTGTGCGTATCCGTCATGAAAATGGTATGTACAGCCGCTACCTTCACATGGTAAACGGGTCAATCCGGGTTAAAATTGGACAGAAAGTTAAAGCAGGGACGGTTTTAGGTCACGAAGGTGAAACCGGTTATTCTTTCGGGGTACATCTCCATTTCGATGTTAACGACGGCAAAAATTACGTGGACCCACTGCCGTACCTGCTGGGCGAAAAATCTCTCGGTTCCAACGCGACTAATAATGAAACAATAGAACCTACAACCAATGTCACATTACATAAAGGAGACAAAGTCACATTGAAAAACGCCCCTCTTTATGGCGCTTCAACCTCAAAAAATAAAGCCAACACCATTAGCGGAACCTACTACGTATATTGTGATGGAATAATTAACAATAGAGTTCGTATTACAACATCGAAAAATAACACAGTTTGTACTGGATGGGTTAACGTTGCAGATTGCAATGTGTCAAGTACCGCCACAGCCACCAAAAAACTGGCTATTGGTGATAATGTTACAGTTAAAGCGGGTGCTAAATTTAGCGATGGGACCGTCCCTTTCGACTTCGTCTATGATACGACGTTTTGCGTCAAAAACATCAGCCGCGATGGCAAAGAAGCTCTGATCGGCTTGGATGGGAAATCGACCGGCTGGATGTATATTACCGACCTGGAAATAGTAGGAAGC**GAGACC**TGT |
| E_78 | TGT**GGTCTC**ACCATGATGAAAATAATTAATGAAAACTTAAAATTTAACGGTGCCCTCACTGCACGTCAGAAGACTGACACTATTGTGTTGCACCACGCACAGTGGTCAAAGGCGTCCGTCTTAGACGTCCATAATTGCCATAAAGGTAAAGGATGGGCGGGAATCGGGTATCACCTGTATATAAGAAAAGATGGCACAGTGTATCAGGGTAGACCGATAGATGCGGTTGGTGCGCACGCCATTCCAGTTAATAAAACATCTGTGGGTATATGTTGTGAGGGTGCGTATCAGACAGAGACCATGCCGGAAGCGCAAAAGACTGCCGTGGTGGAGGCTGTACAGTATGTGCTCGGCCTCTACCCAGGCTGTCGTATCGTGGGACATCGCGAGGTGGATAGTACGGATTGCCCGGGTCAAAACTATCCTCTGGAGGAGATTAAAAATAAAGTTAAAGGGGTATCATCCGTCCCCAGAACGGTGATGAAATTGCCCGCAGAAGTTTATATCCAGGAAATAGAACCGAAAGCATTCGAAATAATGCCTTGTGATTGCGCAAAACGTGAGATCAGCCTGGCCAATTATTTTAATTGTGGATATTTTGCTATCGAGAAGGGCGGCAAAACCATCCCTGTGGGCAATTTAGCCTCTAACGGTGATATTTTTGCGCAGGCGAAAGAAAACGCAAGCTGGCTCAATTTAGCAGGGCATCAGTTAACAACCGTCTATACTCTGACAGATGGGACATGCGGGATAACGAAGACAGACGACCTGGGAGCCATCCGTGGTCTGAAAACCGCAGTATCGGGAATTCCTATTATTGTTGGGGGAAAATACGTTCCCATGGAAGAAATCAAGTCTGAAGGCTACTTTGGTAACGAACTGTATGATACATGGCATGGAAGC**GAGACC**TGT |
| E_82 | TGT**GGTCTC**ACCATGATGGCTAAATTCTACTATAATCAAAACAATTACGATAAGGTGAGTTATGACAATCCAAATACAAAAAAAAAGGAAACTGTGGCATCTAGCGGTTGCGGTGTGTGCAGTGCCTGCATGACTTTCAATAATCTGTGCGGTAAAGAACTGTATACCGTCAGTGAGATGGCGAAGTTTTCGTTATCTCACGGGTGTCGGGATAACTCCGGCACAAATGTCGAAAAGTTGCTGACGGAATTATGCAAGAAACATAAAGAATTTTCGTTTAAAGTTACTGATGACGAAGACAAGCTGGTAGCTCATTTGAAAAAAGGCGGCATCGCCATTGCGAATCAAGGAGACAAATATAACGTCTTCAGCACGGCTGGTCATTTTGTTGTTGCGTACAAGATGAACGGTAAAAATATAGAGGTGTTGGATCCGCAGATGTATTCGGGTAAGTATAATGCATATAAACGACCACAGCGGATCGTTAAAAAAACCTCAACCGGCTGCGTGGTTTCAGTAACACAGATGGGTAAAGCAACGGCGGATCGCCCCAAAGCGTACTTCCTGGTGACATATACTAAACCGAAACCAAAAGTGAAAGCTCCTAATATCAAAGTTGGTAGCTACACACTGACCAATGAACGGGGTATTTATAAAGGAGTTGGAGCTAATAGTGGTCGCAAAAAAGTTAAAGACTTAACGTCGATGGGGAAAAAATATGCCACCAGCAAAAAAGCAAACGACTATGCTTATCTTAAAGCGAAAACCCCGATTACAATCTCCGAGACCAAACTGGCGTCCTCGGGCAACTTATGGGCTAAAATTCCGAGCGGTTGGTTTTGTGTTTGGGAGAAGGATAAAAGCAAAAAATTTGGAAGC**GAGACC**TGT |
| E_86 | TGT**GGTCTC**ACCATGATGGCAACATGCAAAGATTTCTATGACCTGGCACGACAATGGGCCGATACAAATACTGGATATAATAATGGTTGGGGTTATCAGTGCATAGGACTGATTGATGGTCTGAATCGTGCGCTTGGTGCCGGGTTGTCGACCTACGTTCGCAACGATGAAGCAAAAAACATGTATTACGATTATGCGTCTGGTGCCTATCATACGGACGGCTGGCATACAGTTGCCGGGGATCAGCGGGACGATGCAAAGAGTCGTCAGATTTGGAACACCCTGCCCAATGGAGCCATCGTTTTCTGGGAATCATCAACCCAACGCTACGGGCACGTAGCAATAAAGATTGCGGATTGGGGTACTCCATCTGGCGATGTAGTGCAGCAAGATGGTGCGAACAAAACCCGTCCGGCCCATTACTTTAATTCAGGGGCCTTTACCGAAAGTGGAGGCATGGGCTTCATTGGCGCCATAGTATCCGATGACACTGGTTGGTCGGAAGATAAGCCGCAGGGTTCAGGTGGTGCGACCACCCCTTCTGAACCGACACAGCCCAGCGATGCAAAGGAGGAGGCGAAAAAGAATTTCGATGAAATTATTAATAATTTCCTGGATAAGATCAAAGCCCTGTTCAATCAGAATGTTTACACCGCCTCAGAACAATATATGTTCAATAAAACAATCAAACTGACTAAAAACATGAATTTATGGCGTGTGAAGCTGTCGGATGATGCGTTGAAAGAACTCTCAGATGTACTGAATGAAACGATCAAGGATGTGAGTGACACAGTAATCGATAGTACTAAACCAGATCAGTCTGGTAATGCGCCATCCACCACTGTACCAGGAAGC**GAGACC**TGT |
| E_101 | TGT**GGTCTC**ACCATGATGGCGAAGTCTTTAGAAGCCTGGAAAAACTCGGTGTGGAACAAACGTATCGACTTTGACAATGCCTCATATGATTGTGTGGACGTCTCAAAATCCTGGATTCAGTATTTAAGCGATAAACCATGGCAAGAAAGTGCAGGCTGGGGCAACGCTAAGGATATCTATTATAATTGGTATGCGACCTATTTGGAGCGCGTACCCCGCGGCAATGCGCCTAAATTAGGCGACATCGTGGTTATGAACGGTCAAGTGGGCGGTGGTTATGGGCATACTGGTGTGATTGTGGGTGTGGATGGCCAGAATATTACCATCTATCAGCAAAATACATTTACTCAACAGCCTGTTTATACCGGTGTTTTTAATGGTTATGTTAGTTATATTACAGGCTTCTTACGTCCCAAAATCGCATTTAGCGTGTCTGATGCGGTTGCGTTAGAACCGTATCAGCGTATCACGGCCTATGCTGCTAAATATCGAGACGCCCCGAACAGTGCCGCAACCCTGCTTGCTACATTCGATCCTAACGAAGTCGTCAACTTCAAAGGTTGGGTTACCGGGGAAAATGTTGACGGCAACTCAAATTGGTTCGTGGGCCGCTTTACAGGTGGTTACTCTTGGTCTGGCGCTTACACCGACACTGGTACGCATGACCTGACGGATATGAATACGAAACCAGAACCGCTTAAAGATTTCCAGCGTCAGGTTGGCAATTCAGTGATCAATTATCGCACTAAACCTGAAATTATGCCCGATAACGTAATTCGTACTTTTAACGGAAGC**GAGACC**TGT |
| E_110 | TGT**GGTCTC**ACCATGATGGGAAAATATTCTGATGTAAGAGCATCCTTTCAGAACCTTATCGGAACGAACGGCTCGGATATCCAGAACGCATACGGTATGCAGGGCGATTGGTGTATGATGACCGTTTGGACTGCATTTCGGAATGCAGATGCTCTTGACAGACTGGCAGACGGCATGAAGACTGCGTGGGTGCCGTCACTCTGGGATTGGTATGACGATAGAGGGATGACAGGCTACACTCCGCAGGCAGGAGCATTGGTTTTCTACGATTATAACCAGAATGGGACACCGGATCATATTGAGTATTGTGATACTGTGCTGGGAGAAATGGCGATTACCACCATAGCTGGCAATACAGGCGATTGTGTTAATGTAAAAAACCCAACACGCAGTGATTATTACATGCGGAGCAACGTCCTTGGTTTTGCATATCCAGATTATAAAGAGGAAGAAATAGAAGTGGAAGAAGAAAAAAAAGTGGAAGATGATACTATGCAATTCATATACCGCCCCAATATGGAAAATTATATGGTGTATTATGATGGGAATGAACACCATCCGCTGCATCATCCGGATGAAGTTACTGCAATTAACATGTGTTTTAAAAATTGCTTTGGGCGTGACATACCAATTTTCGAACTGGGCTCTAAAGAAGCGCCGTGGGCAACGCGTTTCCGTGCGGGTTCTGAACGCCTTTTTGAGAAAAAGGAGGCCACAGTCGGAAGC**GAGACC**TGT |
| E_119 | TGT**GGTCTC**ACCATGTTTATTGCAGCTGCGATGAATGCTGGCGGAATCAAAATGAGTGCGAGTGGAGTCTCCACACAGTGGAAGAAAACTAAATGGGCTGACAAAGGCACCATTGATACCTTGCCAAAGGATCGTGTATGTTGCCTGTACCGCGAGGATCCGCAGGCTAACCCAATGCAGCATGGCGGCGTGTATCTTGGTAACGGGTATGAAATTGACGCTAGTGGGAGCAAAACAGGAGTCATTAAACGGAAAGTCAACGCATACAAGTGGACCCATTGGGGTGTACCCAAAGGTTTAGAAAATCAGGAATCGAATGATGAAGTGATAAAAGTTTTATACACGGGTACTGTATACGCGGCCAATGGCCGCGATGTACGTATGAGAGCCGGCATGAGCACGAATGCAAACGTCATTAAATCATTGCCGGTCGGGACCCCAGTTAATGTTCTGGAAGAATATAATGGCTGGTATAAGATCGGGGTCGATGGATCCGTCGGTTATATGATGAGTGATTTTATTAAAAAAGAGGAGCAGTCTTCTCCAATCGAATACTACTATGTAAAAATTCCCTGTTCAAGTAAGGAACAGGCTGAGGCATTTGCCGCGGCTTTCAAAAAAGCAGTTGTTGATGGAAGC**GAGACC**TGT |
| E_120 | TGT**GGTCTC**ACCATGATCATCGTGTGGCGTGCAGGTAAGAAGCAGAATGGCAATGACGGTGCAGGTCATGTTGGTGTAGTCGAACAGATCTTCGATAACGGAGACATTACCGTCAGCCAATCGGCATATGGCGGCAATGAATTCTATACCTCTAAGCTTACAAAAGCATCCGGCTACACTTATAGTGCTGATCGCCCGCTTGAGGGTTTTGTTTACTGCGGAATTGAATTTGAGCAACCAACTCCTACACCAACACCGTCTGAAGATCTGAATAAAAACACTATACCGAATCGTTTCAAAGTCCTGAACAAAGATGGTAAACAGCTGGGCGCTTACACAAACTATTCACTTGCCTGTAACTTTGCCAAAAGCGTAGGTGCGATCGTCATCGACAGCGCCAACAATAACAAGCAGGTTTATCCGGAAGAAGTCATTAAAAGCGAATTAACTGCTACCTCGTATCCTGATTATACGGGAAACGATTATTACCGGGTTCGGAAATCTTTTGCGGATTCCGGTTCTAGTAAAGGATCGTTCCAGAAGTGGAAGAATGCTTTTAATACATGGAATGCAAATAAGGCATCTGGGTATCACGTGTATGATTATGACGGAAACCAGTTAGATGGAAGC**GAGACC**TGT |
| E_122 | TGT**GGTCTC**ACCATGTGTGCTGAGACCATTGCCGGGTATAAAATTGATCTGCCGGTGTTCTATGACTTTGAGTACAATACGGAGGAATATGCAAAAAAGAATGGCGTTATATACGACAAAAAGCGTCGTACGGACATTGTCTGCGCTTTTTGTGATCGTATCGCCGTGAAAGGTTACAAACCGGGCGTGTACGCGAATATGGACTATCTGCGTTACCGTTTTGACGCGGCGCGTCTCAAGAAATACCCACTTTGGTTCGCCTATTATGTTAAGTGGGACGGCACAGCAAGCTTTGATAAGACTGCGCCGAATGGTATCCCTTCTGCGTACGCGAATGCAATGATCTGGCAATTCGGCATGTGTAAAATGCCGGGGGGGGGAGCAGGTAATATCGATATTAATTATGGCTATAACATGCCGGCAGCAAACAAAACGCCAGAAGATAATGCAGCAAAATATACGGTAGGGCAGAAATATACTATCAAACGCGGAGATATTTATACAAACGGAAATCCAGTTCCCTCGCGTCTGATCGGCAAAGTTTATACGATTATGCAGACTAAGCCGGGAGCTATTCTGCTCAGAGAAATCATGTCTTGGGTGCGCATAGGAAGC**GAGACC**TGT |

Supplementary Table Overview domain predictions. Protein functions were analyzed by predicting the functional domains with InterProScan [2] and linking the predicted domains to domain clusters as determined in PhaLP. The number of proteins within each library is depicted, together with the number and percentage of proteins for which one or more domains was predicted, after InterProScan prediction or after selecting domains included in the PhaLP classification [1]

| Library | No. proteins | Proteins with InterProScan prediction (No.) | Proteins with prediction (%) | Proteins domains included in PhaLP (No.) | Proteins with one or more domains in PhaLP (%) |
| --- | --- | --- | --- | --- | --- |
| All | 8  825 | 6  700 | 75.9 | 6  437 | 72.9 |
| L1 | 1  327 | 1  061 | 80.0 | 1  001 | 75.4 |
| L2 | 1  881 | 1  494 | 79.4 | 1  441 | 76.6 |
| L3 | 2  059 | 1  607 | 78.0 | 1  537 | 74.6 |
| L4 | 1  695 | 1  230 | 72.5 | 1  182 | 69.7 |
| L5 | 2  087 | 1  494 | 71.6 | 1  456 | 69.8 |

Supplementary Table Domain architecture distribution across different libraries. L1-L3 originate from pig feces, L4 and L5 from sewage samples. Each number represents the relative abundance of proteins with a specific architecture among all proteins in the library with at least one predicted domain as classified in PhaLP [1], expressed as percentage. EAD: enzymatically active domain, CBD; cell wall-binding domain

| Type architecture | L1 | L2 | L3 | L4 | L5 | Lall |
| --- | --- | --- | --- | --- | --- | --- |
| EAD | 55.6 | 55.5 | 57.6 | 75.3 | 72.6 | 62.9 |
| EAD:CBD | 15.9 | 22.4 | 18.2 | 13.3 | 13.8 | 17.0 |
| CBD | 5.86 | 6.94 | 6.08 | 2.99 | 3.96 | 5.31 |
| EAD:CBD:CBD | 7.27 | 5.62 | 5.30 | 2.02 | 2.88 | 4.58 |
| EAD:EAD | 3.91 | 1.98 | 2.70 | 1.05 | 2.52 | 2.46 |
| CBD:EAD | 4.07 | 1.87 | 2.81 | 1.80 | 0.480 | 2.15 |
| CBD:CBD | 1.72 | 1.87 | 2.08 | 1.50 | 1.68 | 1.85 |
| EAD:CBD:CBD:CBD | 2.81 | 0.881 | 1.45 | 0.90 | 0.720 | 1.13 |
| CBD:CBD:EAD | 0.704 | 0.496 | 1.09 | 0.224 | 0.180 | 0.577 |
| EAD:EAD:CBD | 0.235 | 0.330 | 0.94 | 0.449 | 0.360 | 0.462 |
| CBD:CBD:CBD | 0.469 | 0.330 | 0.31 | 0.00 | 0.360 | 0.308 |
| EAD:EAD:CBD:CBD | 0.313 | 0.00 | 0.62 | 0.00 | 0.240 | 0.257 |
| EAD:CBD:EAD | 0.469 | 0.330 | 0.16 | 0.00 | 0.00 | 0.192 |
| EAD:CBD:CBD:CBD:CBD | 0.391 | 0.275 | 0.00 | 0.00 | 0.00 | 0.128 |
| EAD:EAD:CBD:CBD:CBD | 0.00 | 0.551 | 0.00 | 0.00 | 0.00 | 0.128 |
| CBD:EAD:CBD | 0.235 | 0.00 | 0.156 | 0.224 | 0.00 | 0.115 |
| EAD:CBD:CBD:EAD | 0.00 | 0.220 | 0.00 | 0.00 | 0.24 | 0.103 |
| EAD:EAD:EAD | 0.00 | 0.00 | 0.16 | 0.22 | 0.00 | 0.0770 |
| EAD:EAD:CBD:EAD:CBD | 0.00 | 0.275 | 0.00 | 0.00 | 0.00 | 0.0641 |
| CBD:CBD:CBD:CBD | 0.00 | 0.00 | 0.208 | 0.00 | 0.00 | 0.0513 |
| CBD:CBD:CBD:EAD | 0.00 | 0.00 | 0.208 | 0.00 | 0.00 | 0.0513 |
| EAD:CBD:EAD:CBD | 0.00 | 0.220 | 0.00 | 0.00 | 0.00 | 0.0513 |

Supplementary Table Specific domain architecture distribution across the libraries. Each value represents the relative abundance (expressed as percentage) of the proteins with a specific domain architecture among all proteins with at least one predicted domain as classified by PhaLP [1] for each library. Libraries L1-L3 were derived from fecal samples of pigs, L4 and L5 originate from sewage. Domain abbreviations are derived as those used in InterProScan [2]

| Domain_architecture | L1 | L2 | L3 | L4 | L5 | Lall |
| --- | --- | --- | --- | --- | --- | --- |
| Library source | Pig feces | Pig feces | Pig feces | Sewage | Sewage | NA |
| PET_M15 | 6.80 | 7.54 | 7.53 | 11.4 | 12.5 | 9.03 |
| SLT_related | 8.13 | 6.83 | 7.01 | 11.4 | 10.6 | 8.67 |
| Ami_2 | 9.38 | 8.04 | 7.69 | 8.90 | 7.02 | 8.13 |
| GH24 | 2.27 | 3.30 | 3.01 | 8.30 | 10.98 | 5.53 |
| Ami_3 | 5.24 | 6.06 | 6.86 | 4.26 | 4.26 | 5.43 |
| GH25 | 4.07 | 5.45 | 5.09 | 4.11 | 2.94 | 4.39 |
| Hydro_2 | 3.60 | 5.07 | 4.68 | 4.79 | 3.18 | 4.34 |
| PET_M23 | 4.30 | 3.52 | 3.74 | 3.96 | 3.60 | 3.80 |
| GLUCO | 4.22 | 3.30 | 3.38 | 4.94 | 3.60 | 3.75 |
| GH108: PG_3 | 3.75 | 1.10 | 2.29 | 6.73 | 6.24 | 3.69 |
| CHAP | 3.28 | 3.14 | 4.10 | 2.54 | 2.76 | 3.23 |
| PG_1 | 3.21 | 3.96 | 3.79 | 1.57 | 2.34 | 3.04 |
| NLPC_P60 | 1.33 | 1.54 | 2.49 | 4.56 | 3.48 | 2.64 |
| CHAP: PG_1 | 1.72 | 3.41 | 1.56 | 0.299 | 0.360 | 1.539 |
| Ami_2: PG_1 | 1.25 | 1.87 | 1.56 | 0.748 | 0.840 | 1.308 |
| GH108 | 0.78 | 0.39 | 0.42 | 2.2 | 2.8 | 1.3 |
| Ami_3: SPOR | 1.1 | 2.1 | 1.7 | 0.15 | 0.48 | 1.15 |
| SH3 | 1.25 | 1.76 | 1.30 | 0.37 | 0.12 | 1.03 |
| Ami_2: SPOR | 0.47 | 2.20 | 1.04 | 0.45 | 0.36 | 0.97 |
| GH25: PG_1 | 1.25 | 0.99 | 0.94 | 1.0 | 0.48 | 0.95 |
| GH19 | 0.86 | 0.44 | 0.16 | 1.0 | 1.86 | 0.86 |
| Ami_2: SH3 | 0.31 | 0.99 | 0.94 | 0.60 | 0.84 | 0.77 |
| PG_1: Ami_2 | 1.88 | 0.66 | 1.14 | 0.15 | 0.00 | 0.77 |
| NLPC_P60: PG_1 | 0.63 | 0.55 | 1.56 | 0.00 | 0.60 | 0.72 |
| GH25: CW_7: CW_7: LysM | 1.56 | 0.44 | 0.83 | 0.90 | 0.48 | 0.67 |
| GH25: CW_7: CW_7 | 0.47 | 1.16 | 1.09 | 0.22 | 0.18 | 0.65 |
| MUR | 0.16 | 0.06 | 0.16 | 0.97 | 1.86 | 0.63 |
| PG_1: PG_1 | 0.31 | 0.44 | 0.83 | 0.60 | 0.36 | 0.54 |
| Ami_3: CW_7: CW_7 | 0.70 | 0.66 | 0.47 | 0.00 | 0.36 | 0.46 |
| GH25: CW_7 | 0.31 | 0.55 | 0.73 | 0.15 | 0.24 | 0.44 |
| PET_C39 | 0.39 | 0.28 | 0.62 | 0.75 | 0.18 | 0.44 |
| PG_3 | 0.86 | 0.11 | 0.00 | 0.37 | 0.90 | 0.42 |
| PET_M15: PG_1 | 0.16 | 0.44 | 0.42 | 0.30 | 0.60 | 0.41 |
| Ami_5 | 0.47 | 0.28 | 0.42 | 0.22 | 0.54 | 0.40 |
| CHAP: CW_7 | 0.47 | 0.22 | 0.42 | 0.75 | 0.00 | 0.36 |
| LysM | 0.39 | 0.28 | 0.31 | 0.37 | 0.48 | 0.36 |
| Ami_5: SLT_related | 0.47 | 0.66 | 0.21 | 0.00 | 0.24 | 0.33 |
| GH25: LysM | 0.16 | 0.33 | 0.31 | 0.45 | 0.36 | 0.31 |
| GLUCO: SPOR | 0.00 | 1.10 | 0.21 | 0.00 | 0.00 | 0.31 |
| PG_1: SH3 | 0.31 | 0.44 | 0.52 | 0.15 | 0.00 | 0.31 |
| CHAP: SH3 | 1.25 | 0.11 | 0.21 | 0.00 | 0.00 | 0.28 |
| GH25: SH3 | 0.31 | 0.22 | 0.31 | 0.45 | 0.12 | 0.28 |
| GLUCO: LysM | 0.00 | 0.66 | 0.42 | 0.00 | 0.24 | 0.28 |
| Ami_2: CW_7: CW_7 | 0.47 | 0.50 | 0.31 | 0.00 | 0.18 | 0.27 |
| CW_7 | 0.16 | 0.44 | 0.31 | 0.15 | 0.12 | 0.26 |
| GLUCO: CW_7 | 0.16 | 0.44 | 0.31 | 0.00 | 0.24 | 0.26 |
| CW_7: CW_7 | 0.31 | 0.33 | 0.21 | 0.00 | 0.24 | 0.23 |
| GH25: CW_7: LysM | 0.70 | 0.33 | 0.16 | 0.00 | 0.00 | 0.23 |
| GH25: LysM: LysM | 0.23 | 0.33 | 0.16 | 0.22 | 0.18 | 0.23 |
| PET_M23: PG_1 | 0.16 | 0.33 | 0.10 | 0.30 | 0.24 | 0.23 |
| PG_1: PET_M15 | 0.31 | 0.22 | 0.31 | 0.00 | 0.24 | 0.23 |
| Ami_2: CW_7 | 0.16 | 0.44 | 0.21 | 0.00 | 0.12 | 0.21 |
| YkuD | 0.31 | 0.22 | 0.10 | 0.30 | 0.18 | 0.21 |
| Ami_2: SH3: SH3 | 0.47 | 0 | 0.31 | 0.00 | 0.18 | 0.19 |
| Ami_2: SPOR: CW_7 | 0.23 | 0.33 | 0.16 | 0.00 | 0.18 | 0.19 |
| Ami_2: SPOR: SPOR | 0.23 | 0.17 | 0.31 | 0.00 | 0.18 | 0.19 |
| GLUCO: LysM: LysM | 0.23 | 0.00 | 0.00 | 0.45 | 0.36 | 0.19 |
| PET_M23: CW_7: CW_7 | 0.23 | 0.33 | 0.47 | 0.00 | 0.00 | 0.19 |
| Ami_3: PG_1 | 0.00 | 0.44 | 0.21 | 0.15 | 0.00 | 0.18 |
| CHAP: SLT_related | 0.63 | 0.11 | 0.21 | 0.00 | 0.00 | 0.18 |
| GH24: CW_7 | 0.00 | 0.44 | 0.31 | 0.00 | 0.00 | 0.18 |
| LysM: LysM | 0.16 | 0.33 | 0.00 | 0.45 | 0.00 | 0.18 |
| PET_M15: SH3 | 0.00 | 0.44 | 0.21 | 0.00 | 0.12 | 0.18 |
| Ami_2: PG_1: SH3 | 0.23 | 0.17 | 0.31 | 0.22 | 0.00 | 0.15 |
| Ami_2: SLH | 0.47 | 0.00 | 0.10 | 0.15 | 0.12 | 0.15 |
| CHAP: LysM | 0.00 | 0.22 | 0.42 | 0.00 | 0.00 | 0.15 |
| CW_7: CW_7: LysM | 0.47 | 0.00 | 0.16 | 0.00 | 0.18 | 0.15 |
| CW_7: LysM | 0.16 | 0.11 | 0.10 | 0.00 | 0.36 | 0.15 |
| GH25: PET_M15 | 0.00 | 0.11 | 0.31 | 0.00 | 0.24 | 0.15 |
| GLUCO: CW_7: CW_7 | 0.00 | 0.50 | 0.00 | 0.00 | 0.18 | 0.15 |
| PET_C39: SH3: SH3 | 0.23 | 0.00 | 0.16 | 0.45 | 0.00 | 0.15 |
| PET_M23: LysM | 0.47 | 0.00 | 0.10 | 0.15 | 0.12 | 0.15 |
| PG_1: CHAP | 0.31 | 0.22 | 0.21 | 0.00 | 0.00 | 0.15 |
| PG_1: NLPC_P60 | 0.16 | 0.22 | 0.21 | 0.30 | 0.00 | 0.15 |
| PG_1: PG_1: PET_C39 | 0.23 | 0.33 | 0.16 | 0.00 | 0.00 | 0.15 |
| PG_1: PG_1: PET_M15 | 0.23 | 0.17 | 0.31 | 0.00 | 0.00 | 0.15 |
| SH3: SH3 | 0.31 | 0.11 | 0.10 | 0.00 | 0.24 | 0.15 |
| SLT_related: Ami_2 | 0.31 | 0.11 | 0.31 | 0.00 | 0.00 | 0.15 |
| SPOR | 0.00 | 0.28 | 0.26 | 0.07 | 0.00 | 0.14 |
| Ami_2: Ami_2 | 0.00 | 0.11 | 0.00 | 0.00 | 0.48 | 0.13 |
| GH25: CHAP: CW_7: CW_7: CW_7 | 0.00 | 0.55 | 0.00 | 0.00 | 0.00 | 0.13 |
| NLPC_P60: SLT_related | 0.47 | 0.00 | 0.10 | 0.15 | 0.00 | 0.13 |
| SLT_related: Ami_5 | 0.16 | 0.00 | 0.31 | 0.15 | 0.00 | 0.13 |
| Ami_3: CW_7: SPOR | 0.47 | 0.00 | 0.16 | 0.00 | 0.00 | 0.12 |
| CHAP: PG_1: Ami_2 | 0.23 | 0.17 | 0.16 | 0.00 | 0.00 | 0.12 |
| Pesticin_C | 0.00 | 0.00 | 0.00 | 0.45 | 0.18 | 0.12 |
| Ami_2: CW_7: CW_7: CW_7 | 0.31 | 0.00 | 0.21 | 0.00 | 0.00 | 0.10 |
| Ami_2: GLUCO | 0.00 | 0.11 | 0.21 | 0.00 | 0.12 | 0.10 |
| Ami_3: CW_7 | 0.00 | 0.22 | 0.21 | 0.00 | 0.00 | 0.10 |
| Ami_3: CW_7: CW_7: CW_7 | 0.31 | 0.00 | 0.21 | 0.00 | 0.00 | 0.10 |
| Ami_3: LysM | 0.16 | 0.22 | 0.10 | 0.00 | 0.00 | 0.10 |
| CHAP: CW_7: CW_7: CW_7 | 0.31 | 0.22 | 0.00 | 0.00 | 0.00 | 0.10 |
| GLUCO: Ami_2 | 0.00 | 0.11 | 0.21 | 0.00 | 0.12 | 0.10 |
| GLUCO: Ami_3 | 0.00 | 0.11 | 0.10 | 0.15 | 0.12 | 0.10 |
| LysM: YkuD | 0.31 | 0.00 | 0.21 | 0.00 | 0.00 | 0.10 |
| PET_M15: GH25 | 0.31 | 0.00 | 0.21 | 0.00 | 0.00 | 0.10 |
| PG_1: MUR | 0.00 | 0.00 | 0.00 | 0.45 | 0.12 | 0.10 |
| Ami_2: CW_1: CW_1 | 0.23 | 0.00 | 0.16 | 0.00 | 0.00 | 0.08 |
| Ami_2: LysM | 0.16 | 0.00 | 0.00 | 0.00 | 0.24 | 0.08 |
| Ami_3: PG_1: PG_1 | 0.00 | 0.00 | 0.00 | 0.00 | 0.36 | 0.08 |
| Ami_5: ZoocinA_TRD | 0.00 | 0.00 | 0.00 | 0.00 | 0.36 | 0.08 |
| CHAP: Ami_2 | 0.31 | 0.22 | 0.00 | 0.00 | 0.00 | 0.08 |
| CHAP: CW_7: CW_7 | 0.00 | 0.17 | 0.16 | 0.00 | 0.00 | 0.08 |
| CHAP: LysM: SH3 | 0.00 | 0.17 | 0.16 | 0.22 | 0.00 | 0.08 |
| CHAP: PG_1: PG_1 | 0.23 | 0.00 | 0.00 | 0.22 | 0.00 | 0.08 |
| GH25: SH3: SH3 | 0.23 | 0.00 | 0.16 | 0.00 | 0.00 | 0.08 |
| GLUCO: CHAP: PG_1 | 0.00 | 0.00 | 0.00 | 0.22 | 0.18 | 0.08 |
| GLUCO: CW_7: LysM | 0.00 | 0.33 | 0.00 | 0.00 | 0.00 | 0.08 |
| LysM: LysM: LysM | 0.00 | 0.17 | 0.16 | 0.00 | 0.00 | 0.08 |
| LysM: SLT_related | 0.00 | 0.00 | 0.10 | 0.15 | 0.12 | 0.08 |
| NLPC_P60: CW_7: CW_7 | 0.47 | 0.00 | 0.00 | 0.00 | 0.00 | 0.08 |
| PET_M23: GH25 | 0.31 | 0.00 | 0.00 | 0.00 | 0.12 | 0.08 |
| PET_M23: SH3 | 0.00 | 0.00 | 0.21 | 0.15 | 0.00 | 0.08 |
| PG_1: GH25: PG_1 | 0.23 | 0.00 | 0.16 | 0.00 | 0.00 | 0.08 |
| SH3: GH25 | 0.16 | 0.22 | 0.00 | 0.00 | 0.00 | 0.08 |
| SH3: Hydro_2 | 0.00 | 0.11 | 0.10 | 0.15 | 0.00 | 0.08 |
| SH3: SH3: NLPC_P60 | 0.23 | 0.00 | 0.16 | 0.00 | 0.00 | 0.08 |
| SH3: YkuD | 0.31 | 0.11 | 0.00 | 0.00 | 0.00 | 0.08 |
| SLT_related: PG_1 | 0.16 | 0.22 | 0.00 | 0.00 | 0.00 | 0.08 |
| SLT_related: PG_1: PG_1 | 0.23 | 0.00 | 0.16 | 0.00 | 0.00 | 0.08 |
| SLT_related: SH3 | 0.16 | 0.11 | 0.10 | 0.00 | 0.00 | 0.08 |
| Ami_3: LysM: LysM: LysM: LysM | 0.00 | 0.28 | 0.00 | 0.00 | 0.00 | 0.06 |
| CHAP: CW_7: CW_7: CW_7: CW_7 | 0.39 | 0.00 | 0.00 | 0.00 | 0.00 | 0.06 |
| SLH | 0.00 | 0.11 | 0.10 | 0.07 | 0.00 | 0.06 |
| SLT_related: CHAP: PG_1: CHAP: PG_1 | 0.00 | 0.28 | 0.00 | 0.00 | 0.00 | 0.06 |
| Ami_2: LysM: CW_7: CW_7 | 0.00 | 0.00 | 0.00 | 0.00 | 0.24 | 0.05 |
| Ami_2: PG_1: PG_1: CHAP | 0.00 | 0.22 | 0.00 | 0.00 | 0.00 | 0.05 |
| Ami_2: SLT_related: SH3: SH3 | 0.00 | 0.00 | 0.21 | 0.00 | 0.00 | 0.05 |
| Ami_3: Ami_3 | 0.16 | 0.00 | 0.10 | 0.00 | 0.00 | 0.05 |
| Ami_3: Ami_3: PG_1: PG_1 | 0.00 | 0.00 | 0.00 | 0.00 | 0.24 | 0.05 |
| Ami_3: PG_1: PG_1: PET_M15 | 0.00 | 0.00 | 0.00 | 0.00 | 0.24 | 0.05 |
| Ami_3: SH3 | 0.00 | 0.11 | 0.00 | 0.00 | 0.12 | 0.05 |
| Ami_5: PG_1 | 0.00 | 0.22 | 0.00 | 0.00 | 0.00 | 0.05 |
| Ami_5: SH3 | 0.00 | 0.00 | 0.00 | 0.15 | 0.12 | 0.05 |
| CHAP: GH25 | 0.31 | 0.00 | 0.00 | 0.00 | 0.00 | 0.05 |
| CHAP: GH25: SH3: SH3 | 0.31 | 0.00 | 0.00 | 0.00 | 0.00 | 0.05 |
| CHAP: PG_1: GH25: PG_1 | 0.00 | 0.22 | 0.00 | 0.00 | 0.00 | 0.05 |
| CHAP: SLH | 0.16 | 0.00 | 0.00 | 0.15 | 0.00 | 0.05 |
| CHAP: SPOR | 0.00 | 0.00 | 0.21 | 0.00 | 0.00 | 0.05 |
| CW_1: CW_1 | 0.00 | 0.00 | 0.10 | 0.00 | 0.12 | 0.05 |
| CW_1: CW_1: CW_1: GH24 | 0.00 | 0.00 | 0.21 | 0.00 | 0.00 | 0.05 |
| CW_7: GH24 | 0.16 | 0.11 | 0.10 | 0.00 | 0.00 | 0.05 |
| GH24: PG_1 | 0.00 | 0.22 | 0.00 | 0.00 | 0.00 | 0.05 |
| GH24: SH3 | 0.00 | 0.22 | 0.00 | 0.00 | 0.00 | 0.05 |
| GH25: CHAP: PG_1: PG_1 | 0.00 | 0.00 | 0.21 | 0.00 | 0.00 | 0.05 |
| GH25: CW_7: CW_7: CW_7 | 0.00 | 0.22 | 0.21 | 0.00 | 0.00 | 0.05 |
| GH25: LysM: LysM: LysM | 0.31 | 0.00 | 0.00 | 0.00 | 0.00 | 0.05 |
| GH25: SLH | 0.00 | 0.22 | 0.00 | 0.00 | 0.00 | 0.05 |
| GLUCO: NLPC_P60 | 0.16 | 0.00 | 0.00 | 0.15 | 0.00 | 0.05 |
| GLUCO: PG_1 | 0.00 | 0.11 | 0.00 | 0.00 | 0.12 | 0.05 |
| LysM: Ami_2 | 0.16 | 0.00 | 0.10 | 0.00 | 0.00 | 0.05 |
| LysM: LysM: LysM: LysM | 0.00 | 0.00 | 0.21 | 0.00 | 0.00 | 0.05 |
| NLPC_P60: CW_7 | 0.00 | 0.11 | 0.10 | 0.00 | 0.00 | 0.05 |
| NLPC_P60: SH3 | 0.00 | 0.11 | 0.10 | 0.00 | 0.00 | 0.05 |
| PET_C39: PG_1 | 0.16 | 0.11 | 0.10 | 0.00 | 0.00 | 0.05 |
| PET_C39: SH3 | 0.00 | 0.11 | 0.10 | 0.00 | 0.00 | 0.05 |
| PET_M23: CW_7 | 0.16 | 0.11 | 0.00 | 0.00 | 0.00 | 0.05 |
| PET_M23: SLH | 0.16 | 0.00 | 0.10 | 0.00 | 0.00 | 0.05 |
| PET_M23: SLT_related | 0.00 | 0.00 | 0.00 | 0.00 | 0.24 | 0.05 |
| SH3: NLPC_P60 | 0.16 | 0.00 | 0.10 | 0.00 | 0.00 | 0.05 |
| SLT_related: CHAP | 0.00 | 0.11 | 0.10 | 0.00 | 0.00 | 0.05 |
| SLT_related: PET_M15 | 0.00 | 0.00 | 0.00 | 0.00 | 0.24 | 0.05 |
| SLT_related: PET_M15: PG_1: SH3 | 0.00 | 0.00 | 0.21 | 0.00 | 0.00 | 0.05 |
| SLT_related: SLT_related | 0.00 | 0.00 | 0.00 | 0.15 | 0.12 | 0.05 |
| Ami_2: LysM: LysM | 0.00 | 0.00 | 0.00 | 0.00 | 0.18 | 0.04 |
| Ami_2: PG_1: PG_1 | 0.23 | 0.00 | 0.00 | 0.00 | 0.00 | 0.04 |
| Ami_2: SH3: CW_7 | 0.23 | 0.00 | 0.00 | 0.00 | 0.00 | 0.04 |
| Ami_2: SH3: PG_1 | 0.00 | 0.17 | 0.00 | 0.00 | 0.00 | 0.04 |
| Ami_2: SH3: SPOR | 0.23 | 0.00 | 0.00 | 0.00 | 0.00 | 0.04 |
| Ami_2: SLT_related: SH3 | 0.00 | 0.00 | 0.00 | 0.22 | 0.00 | 0.04 |
| Ami_3: GLUCO: SPOR | 0.00 | 0.17 | 0.16 | 0.00 | 0.00 | 0.04 |
| Ami_3: SH3: SH3 | 0.23 | 0.00 | 0.00 | 0.00 | 0.00 | 0.04 |
| Ami_5: CW_7: CW_7 | 0.00 | 0.17 | 0.00 | 0.00 | 0.00 | 0.04 |
| CHAP: CW_7: LysM | 0.00 | 0.00 | 0.16 | 0.00 | 0.00 | 0.04 |
| CHAP: LysM: LysM | 0.00 | 0.00 | 0.00 | 0.00 | 0.18 | 0.04 |
| CHAP: PG_1: GH25 | 0.00 | 0.17 | 0.00 | 0.00 | 0.00 | 0.04 |
| CHAP: SLT_related: NLPC_P60 | 0.00 | 0.00 | 0.16 | 0.00 | 0.00 | 0.04 |
| CW_7: LysM: LysM | 0.00 | 0.00 | 0.00 | 0.00 | 0.18 | 0.04 |
| GH24: CW_7: CW_7 | 0.00 | 0.00 | 0.16 | 0.00 | 0.00 | 0.04 |
| GH25: PET_M23: SH3 | 0.00 | 0.00 | 0.16 | 0.00 | 0.00 | 0.04 |
| GLUCO: Ami_2: SPOR | 0.00 | 0.00 | 0.16 | 0.00 | 0.00 | 0.04 |
| GLUCO: Ami_3: SPOR | 0.00 | 0.17 | 0.00 | 0.00 | 0.00 | 0.04 |
| GLUCO: CHAP: CW_7 | 0.00 | 0.00 | 0.00 | 0.00 | 0.18 | 0.04 |
| LT_GEWL_like | 0.00 | 0.00 | 0.05 | 0.07 | 0.06 | 0.04 |
| LysM: LysM: PET_M23 | 0.00 | 0.00 | 0.00 | 0.22 | 0.00 | 0.04 |
| LysM: LysM: YkuD | 0.00 | 0.00 | 0.00 | 0.00 | 0.18 | 0.04 |
| NLPC_P60: CW_7: LysM | 0.00 | 0.00 | 0.00 | 0.00 | 0.18 | 0.04 |
| NLPC_P60: LysM: PG_1 | 0.00 | 0.17 | 0.00 | 0.00 | 0.00 | 0.04 |
| NLPC_P60: SH3: GH25 | 0.23 | 0.00 | 0.00 | 0.00 | 0.00 | 0.04 |
| PET_C39: GLUCO: PET_M23 | 0.00 | 0.00 | 0.00 | 0.22 | 0.00 | 0.04 |
| PET_C70 | 0.00 | 0.00 | 0.05 | 0.15 | 0.00 | 0.04 |
| PET_M15: CW_7: CW_7 | 0.00 | 0.00 | 0.16 | 0.00 | 0.00 | 0.04 |
| PG_1: NLPC_P60: PG_1 | 0.00 | 0.00 | 0.00 | 0.22 | 0.00 | 0.04 |
| PG_1: PG_1: GH24 | 0.00 | 0.00 | 0.16 | 0.00 | 0.00 | 0.04 |
| PG_1: PG_1: GH25 | 0.00 | 0.00 | 0.16 | 0.00 | 0.00 | 0.04 |
| PG_1: SH3: SH3 | 0.00 | 0.17 | 0.00 | 0.00 | 0.00 | 0.04 |
| SH3: SH3: YkuD | 0.00 | 0.00 | 0.16 | 0.00 | 0.00 | 0.04 |
| SLT_related: Ami_2: SPOR | 0.00 | 0.00 | 0.16 | 0.00 | 0.00 | 0.04 |
| SLT_related: Ami_5: PG_1 | 0.23 | 0.00 | 0.00 | 0.00 | 0.00 | 0.04 |
| SLT_related: CHAP: CW_7 | 0.00 | 0.00 | 0.16 | 0.00 | 0.00 | 0.04 |
| SLT_related: CHAP: PG_1 | 0.00 | 0.00 | 0.16 | 0.00 | 0.00 | 0.04 |
| CHAP: GLUCO | 0.00 | 0.00 | 0.00 | 0.00 | 0.12 | 0.03 |
| CHAP: PET_M23 | 0.16 | 0.00 | 0.00 | 0.00 | 0.00 | 0.03 |
| CW_1: GH24 | 0.00 | 0.00 | 0.00 | 0.15 | 0.00 | 0.03 |
| CW_7: PG_1 | 0.00 | 0.00 | 0.00 | 0.00 | 0.12 | 0.03 |
| GH24: GH24 | 0.00 | 0.11 | 0.00 | 0.00 | 0.00 | 0.03 |
| GH24: NLPC_P60 | 0.00 | 0.00 | 0.10 | 0.00 | 0.00 | 0.03 |
| GH25: CHAP | 0.00 | 0.00 | 0.10 | 0.00 | 0.00 | 0.03 |
| GH25: SPOR | 0.00 | 0.11 | 0.00 | 0.00 | 0.00 | 0.03 |
| Hydro_2: LysM | 0.00 | 0.11 | 0.00 | 0.00 | 0.00 | 0.03 |
| LysM: CHAP | 0.00 | 0.00 | 0.00 | 0.15 | 0.00 | 0.03 |
| LysM: CW_7 | 0.00 | 0.00 | 0.00 | 0.00 | 0.12 | 0.03 |
| LysM: PET_M23 | 0.00 | 0.00 | 0.10 | 0.00 | 0.00 | 0.03 |
| LysM: SH3 | 0.00 | 0.00 | 0.00 | 0.15 | 0.00 | 0.03 |
| MUR: PG_1 | 0.00 | 0.00 | 0.00 | 0.00 | 0.12 | 0.03 |
| NLPC_P60: GH25 | 0.00 | 0.00 | 0.10 | 0.00 | 0.00 | 0.03 |
| NLPC_P60: GLUCO | 0.16 | 0.00 | 0.00 | 0.00 | 0.00 | 0.03 |
| NLPC_P60: LysM | 0.00 | 0.00 | 0.10 | 0.00 | 0.00 | 0.03 |
| NLPC_P60: PET_M23 | 0.00 | 0.00 | 0.00 | 0.00 | 0.12 | 0.03 |
| PET_C39: CW_7 | 0.00 | 0.00 | 0.10 | 0.00 | 0.00 | 0.03 |
| PET_C39: LysM | 0.00 | 0.11 | 0.00 | 0.00 | 0.00 | 0.03 |
| PET_C39: PET_M23 | 0.00 | 0.00 | 0.00 | 0.00 | 0.12 | 0.03 |
| PET_C39: SLT_related | 0.00 | 0.00 | 0.00 | 0.00 | 0.12 | 0.03 |
| PET_C70: SH3 | 0.16 | 0.00 | 0.00 | 0.00 | 0.00 | 0.03 |
| PET_M15: Hydro_2 | 0.00 | 0.00 | 0.00 | 0.15 | 0.00 | 0.03 |
| PET_M15: SLT_related | 0.00 | 0.00 | 0.00 | 0.15 | 0.00 | 0.03 |
| PG_1: Ami_3 | 0.00 | 0.00 | 0.00 | 0.15 | 0.00 | 0.03 |
| PG_1: GH24 | 0.00 | 0.00 | 0.10 | 0.00 | 0.00 | 0.03 |
| PG_1: GH25 | 0.16 | 0.00 | 0.00 | 0.00 | 0.00 | 0.03 |
| PG_1: LysM | 0.00 | 0.00 | 0.10 | 0.00 | 0.00 | 0.03 |
| PG_1: SPOR | 0.00 | 0.00 | 0.00 | 0.00 | 0.12 | 0.03 |
| SH3: GLUCO | 0.00 | 0.00 | 0.00 | 0.15 | 0.00 | 0.03 |
| SH3: LysM | 0.00 | 0.00 | 0.00 | 0.15 | 0.00 | 0.03 |
| SH3: SPOR | 0.16 | 0.00 | 0.00 | 0.00 | 0.00 | 0.03 |
| SLT_related: PET_C39 | 0.00 | 0.11 | 0.00 | 0.00 | 0.00 | 0.03 |
| SLT_related: SLH | 0.00 | 0.00 | 0.10 | 0.00 | 0.00 | 0.03 |
| SPOR: SH3 | 0.00 | 0.11 | 0.00 | 0.00 | 0.00 | 0.03 |
| SPOR: SPOR | 0.00 | 0.00 | 0.10 | 0.00 | 0.00 | 0.03 |
| DUF1906 | 0.00 | 0.00 | 0.00 | 0.07 | 0.00 | 0.01 |
| Pesticin_lyz_like2 | 0.00 | 0.00 | 0.00 | 0.00 | 0.06 | 0.01 |

Supplementary Table 6 *In silico* characterization of a selection of predicted anti-enterococcal lysins. Molecular weight (MW) in kilodalton (kDa), isoelectric point (pI), domain architecture and 3D structures of a random, uninformed selection of 21 anti-enterococcal lysins for functional characterization. Structures were predicted with AlphaFold3 [3], domain delineation was performed with SPAED[4], and domain architecture as predicted with InterProScan[2]. Protein structures are colored according to the predictive local distance difference distance (plDDT) values: dark blue (confident: plDDT > 90), light blue (confident: 70 < plDDT <90), yellow (low: 50 < plDDT < 70), and orange (plDDT < 50). The N-terminal in the 3D-structure is indicated by a red triangle. Domain architectures are pictured as boxes with the size of the box proportional to the size of the predicted domains. Predicted linkers are colored grey, putative enzymatically active domains green, putative cell wall-binding domains brown, and unannotated domains turquoise. Abbreviations follow standard abbreviations as defined by InterPro

| **Protein** | **MW** | **pI** | **3D structure** |
| --- | --- | --- | --- |
| E_24 | 55 | 4.9 | 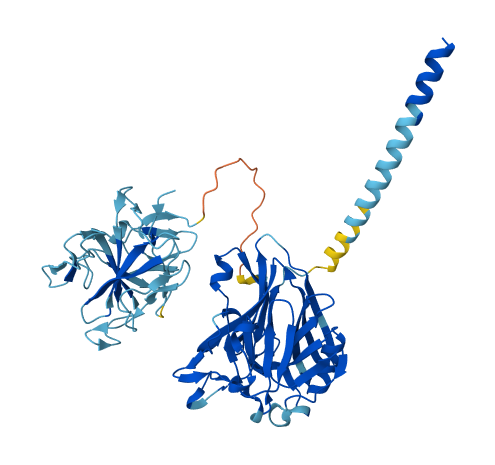 |
| E_25 | 54 | 4.7 | 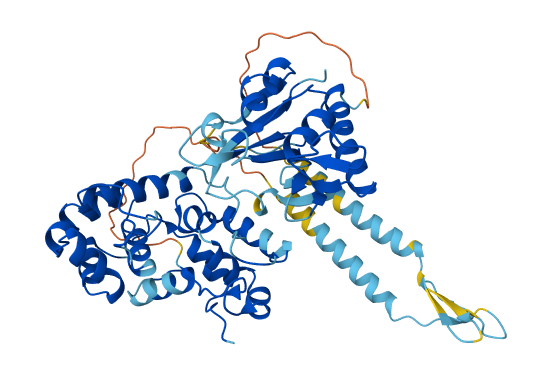 Ami_5 |
| E_28 | 50 | 6.4 | 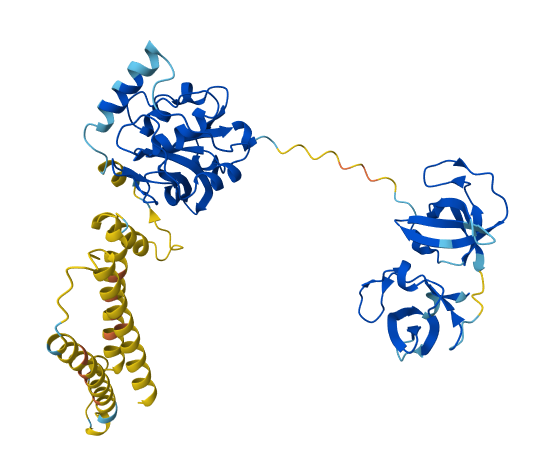 |
| E_31 | 49 | 4.2 | 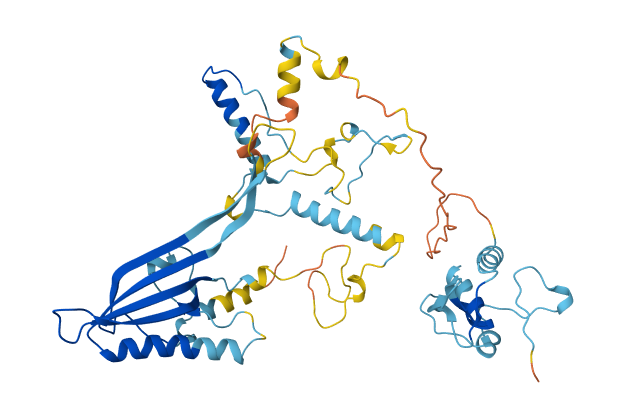 |
| E_46 | 43 | 9.9 | 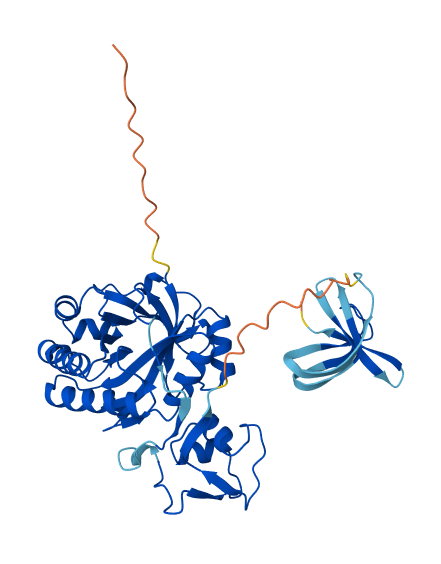 GH_25  LysM |
| E_47 | 43 | 4.7 | 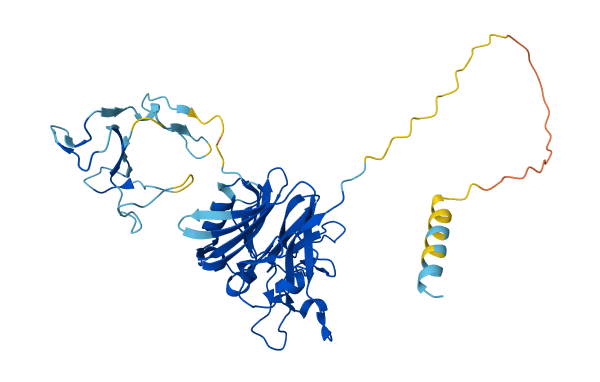 |
| E_58 | 40 | 6.4 | 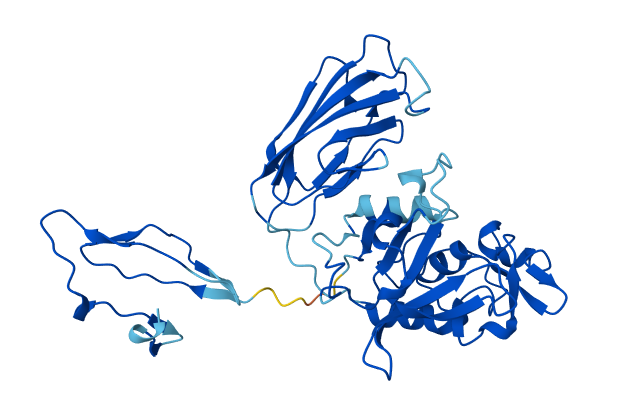 |
| E_60 | 40 | 8.7 | 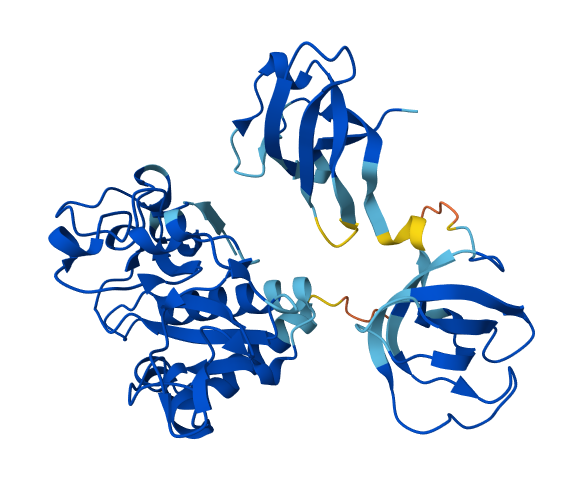 Ami_2 |
| E_61 | 41 | 5.1 | 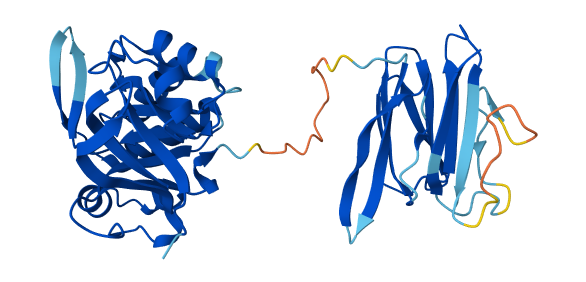 GH_25 |
| E_63 | 39 | 6.2 | 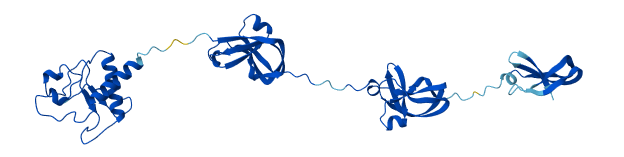 Ami_2 |
| E_65 | 37 | 9.1 | 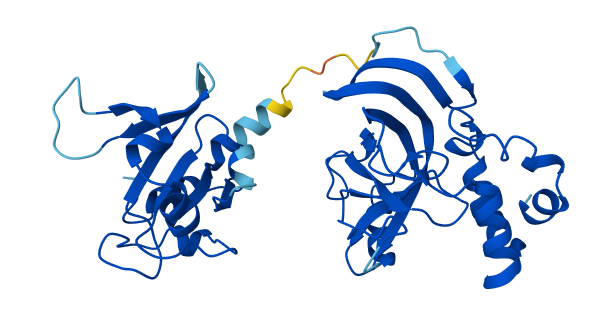 |
| E_72 | 34 | 8.5 | 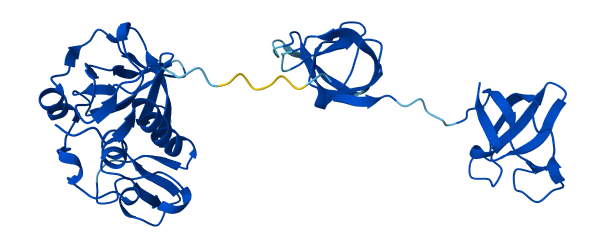 |
| E_76 | 33 | 6.4 | 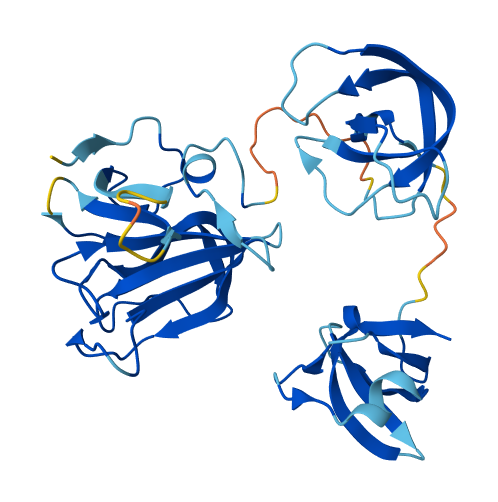 Pet_M23 |
| E_78 | 32 | 6.8 | 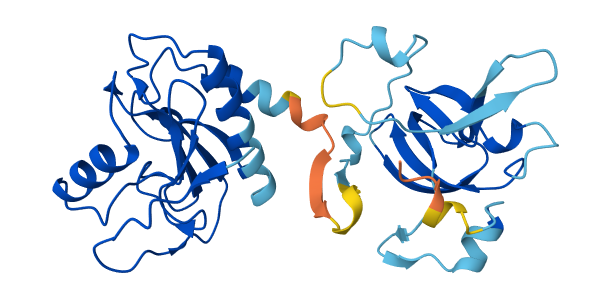 Ami_2 |
| E_82 | 32 | 9.7 | 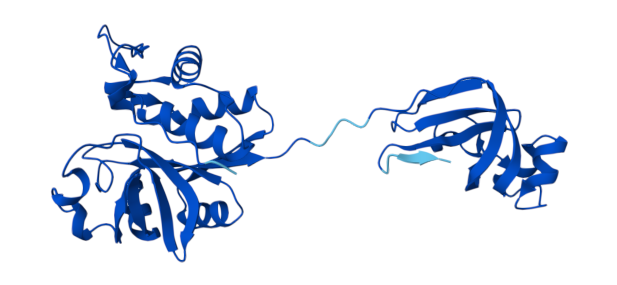 |
| E_86 | 30 | 4.8 | 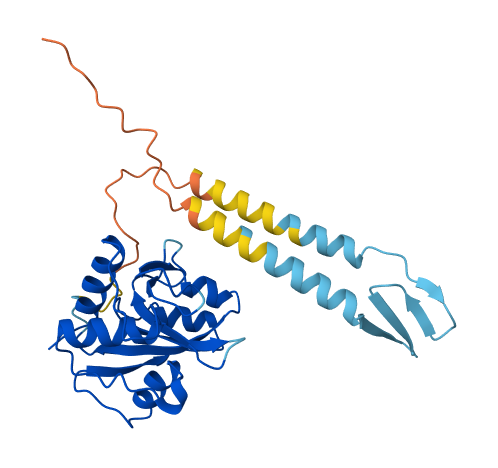 |
| E_101 | 29 | 5.7 | 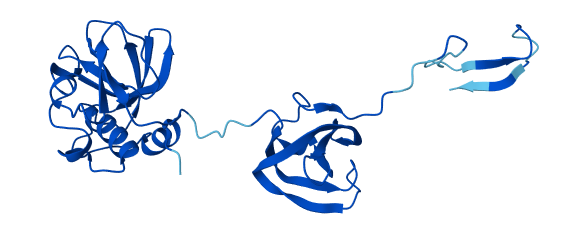 CHAP |
| E_110 | 27 | 4.6 | 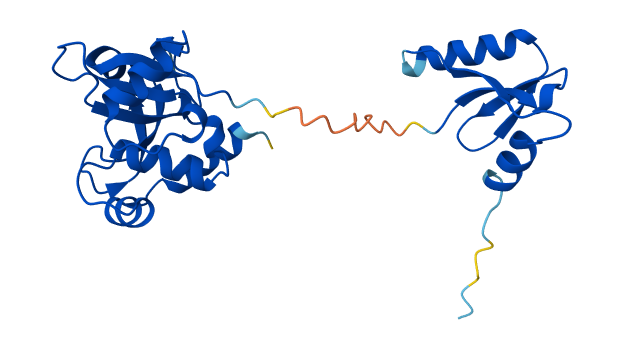 CHAP |
| E_119 | 23 | 8.8 | 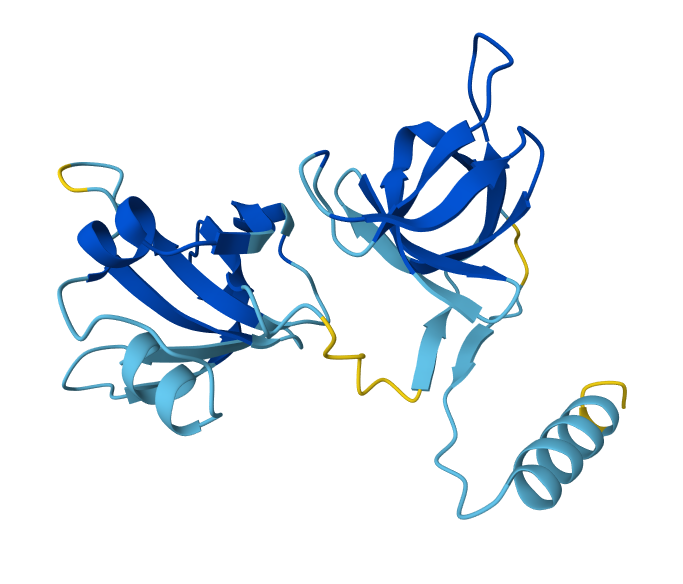 |
| E_120 | 22 | 6.2 | 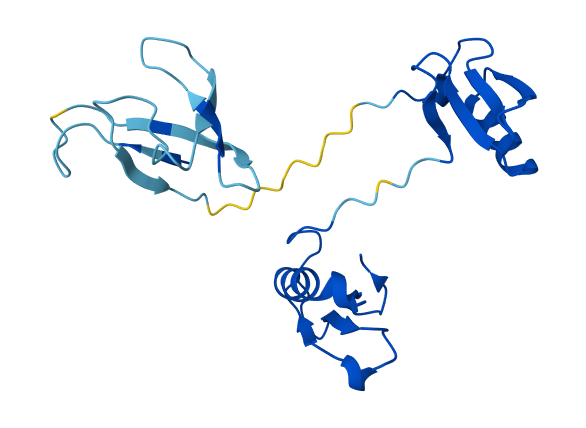 |
| E_122 | 23 | 9.3 | 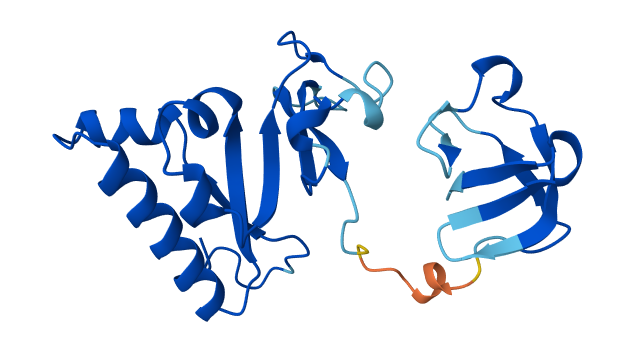 GH_25 |

Supplementary Table . Overview of the purification yields of putative lysins. Putative anti-enterococcal phage lysins were expressed and purified, and their concentration was estimated with micro BCA. The second column lists in which assay the protein was tested (either 1 or 2), while the third column provides the molecular weight (MW) in kilodaltons (kDa). The yield of proteins immediately after metal affinity-based purification is expressed as mg protein per 100 mL expression medium. The final two columns show the final protein concentration used in the assay, given as mass concentration and molar concentration. A conditional formatting was applied, highlighting the highest concentrations in each column with darker orange colors

| Protein | Assay | MW | Yield (mg/100 mL medium) | C final (µM) | C final (mg/mL) |
| --- | --- | --- | --- | --- | --- |
| E_24 | 1 | 55 | 0.17 | 3.2 | 0.17 |
| E_25 | 1 | 53 | 2.5 | 4.8 | 0.25 |
| E_31 | 1 | 49 | 0.16 | 3.2 | 0.16 |
| E_47 | 1 | 43 | 0.14 | 3.2 | 0.14 |
| E_58 | 1 | 40 | 0.25 | 6.3 | 0.25 |
| E_63 | 1 | 39 | 0.24 | 6.0 | 0.24 |
| E_65 | 1 | 36 | 0.22 | 6.1 | 0.22 |
| E_72 | 1 | 34 | 0.32 | 2.4 | 0.08 |
| E_76 | 1 | 33 | 0.33 | 10.0 | 0.33 |
| E_78 | 1 | 32 | 0.37 | 11.6 | 0.37 |
| E_86 | 1 | 32 | 1.6 | 2.5 | 0.08 |
| E_101 | 1 | 29 | 0.18 | 6.1 | 0.18 |
| E_110 | 1 | 27 | 0.36 | 3.3 | 0.09 |
| E_119 | 1 | 23 | 0.19 | 8.3 | 0.19 |
| E_120 | 1 | 22 | 0.22 | 4.9 | 0.11 |
| E_122 | 1 | 23 | 0.25 | 5.6 | 0.13 |
| positive_control | 1 | 34 | 1.8 | 5.3 | 0.18 |
| E_28 | 2 | 50 | 0.58 | 5.1 | 0.26 |
| E_46 | 2 | 43 | 0.54 | 5.1 | 0.22 |
| E_60 | 2 | 40 | 0.56 | 5.0 | 0.20 |
| E_61 | 2 | 40 | 0.48 | 5.0 | 0.20 |
| E_82 | 2 | 32 | 0.97 | 6.1 | 0.19 |
| positive_control | 2 | 34 | 2.4 | 3.5 | 0.12 |


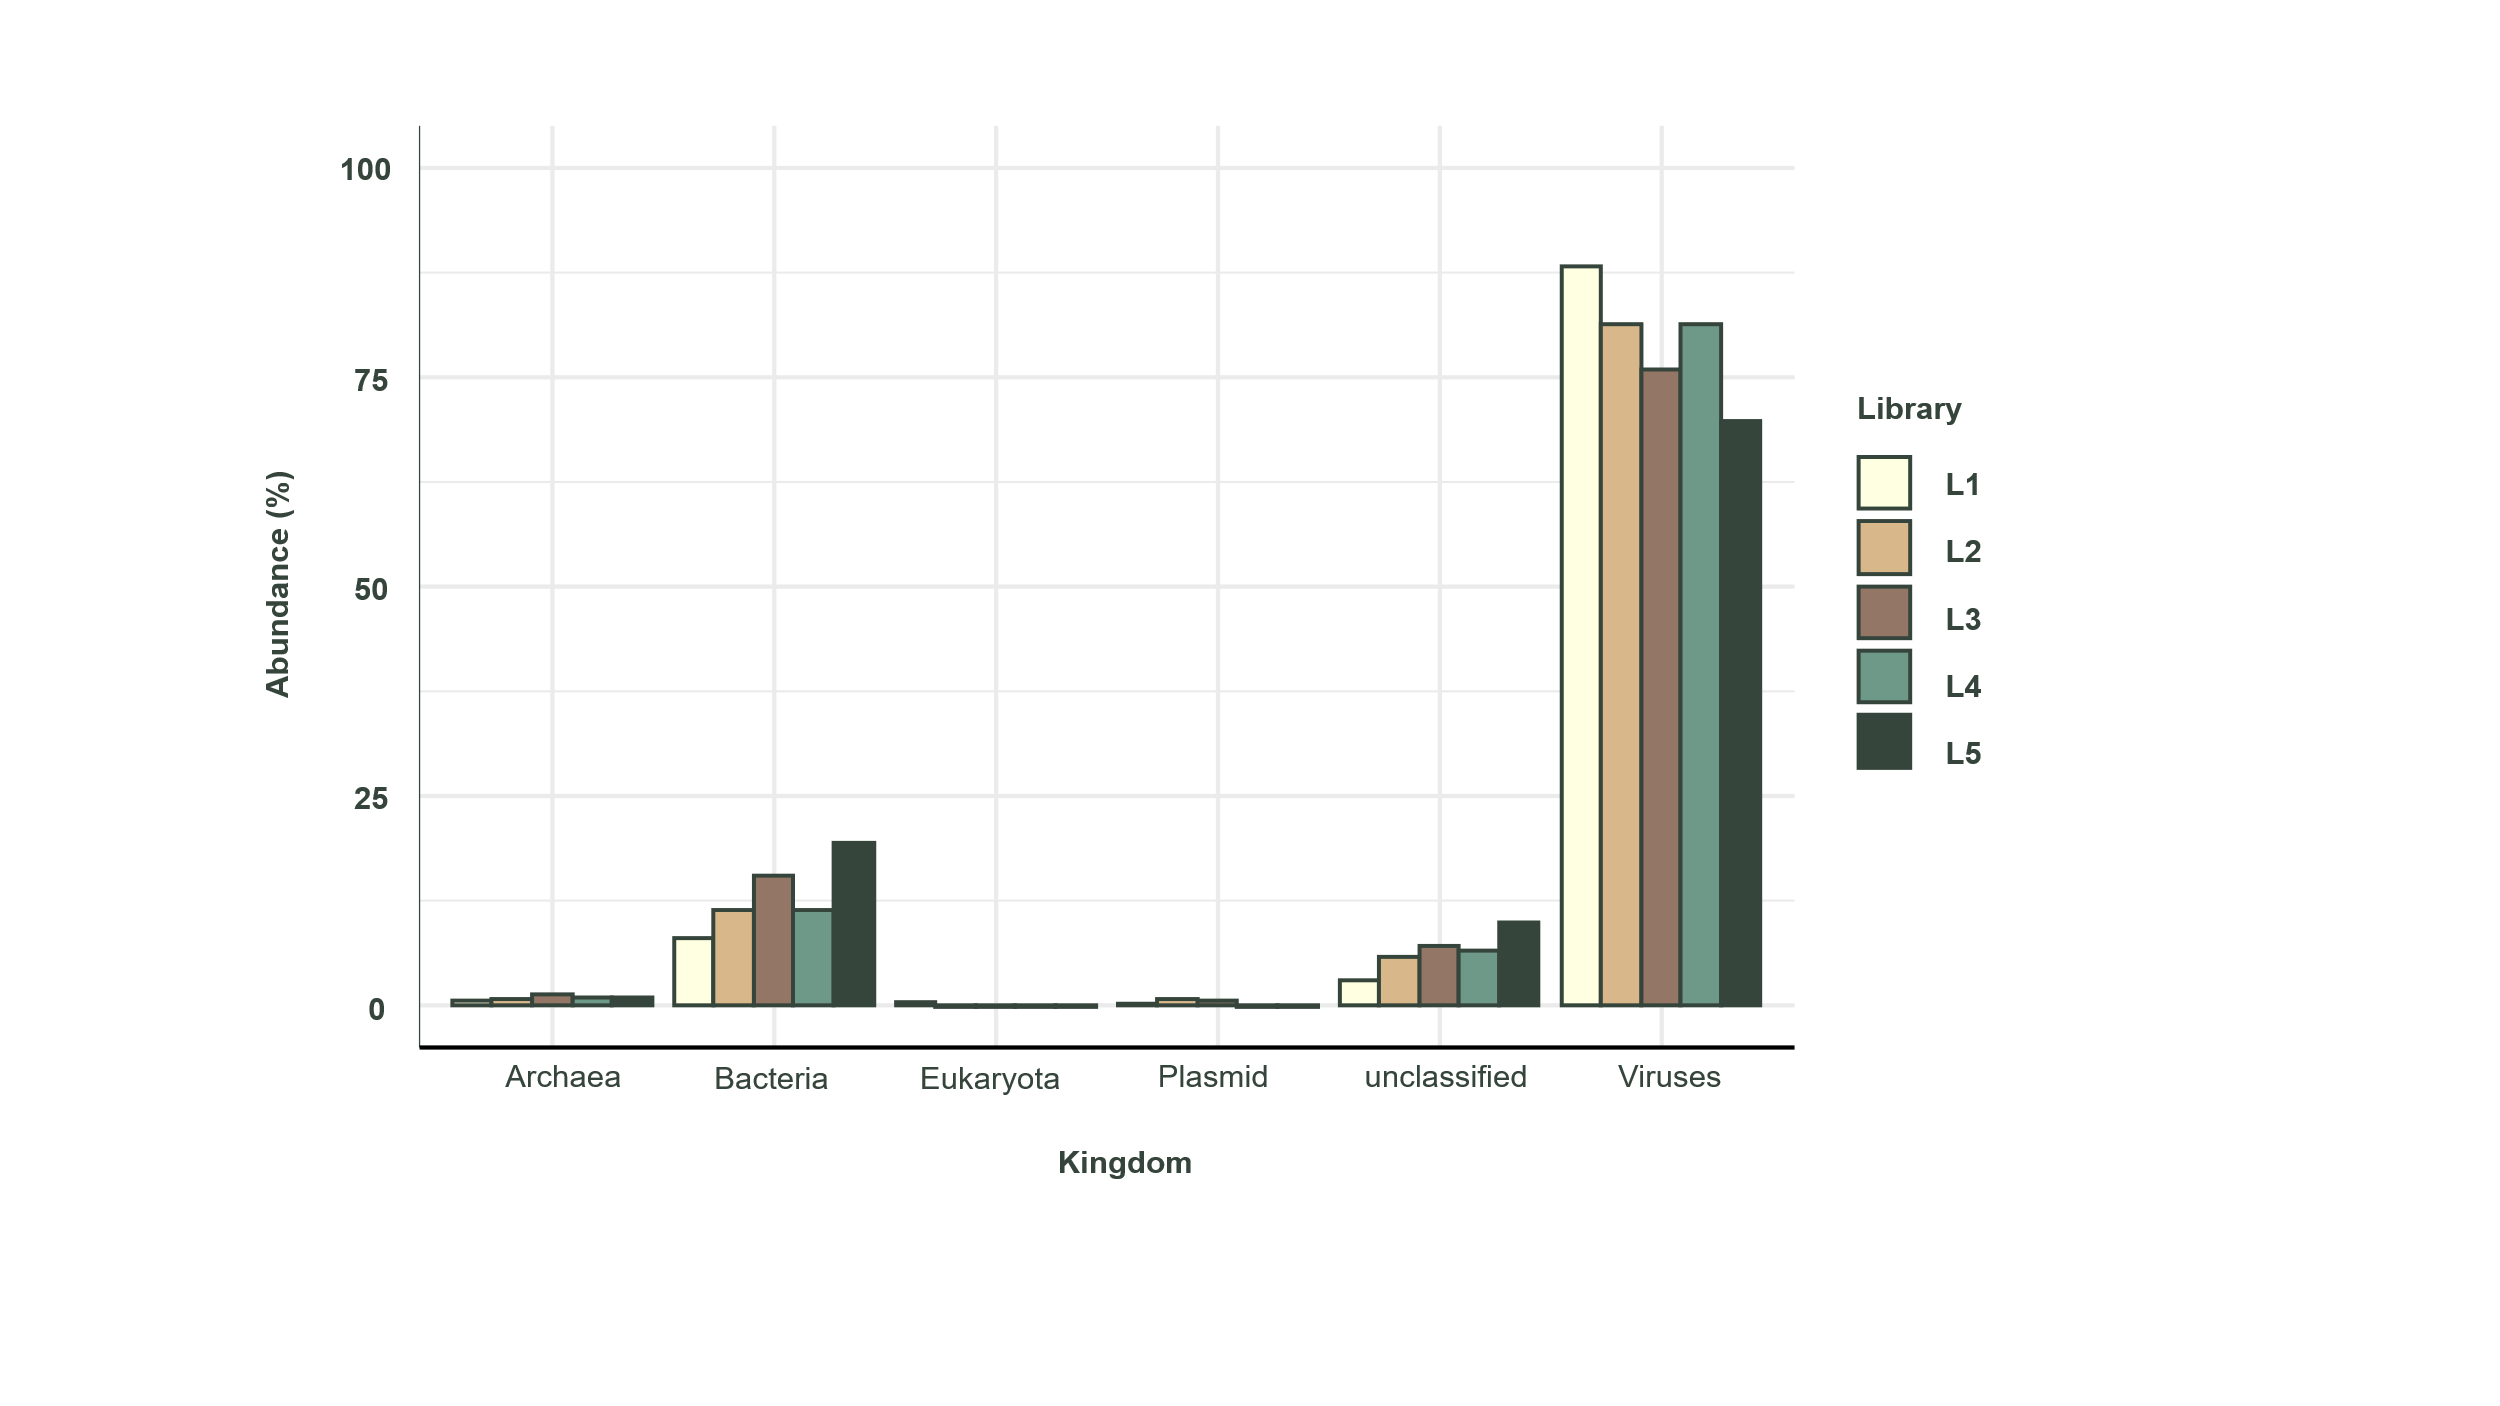


Supplementary Fig. 1 Kingdom distribution of reads. The abundance of reads from each kingdom was quantified by mapping the reads to the classified contigs, and the percentual abundance was calculated by taking the ratio to the total reads


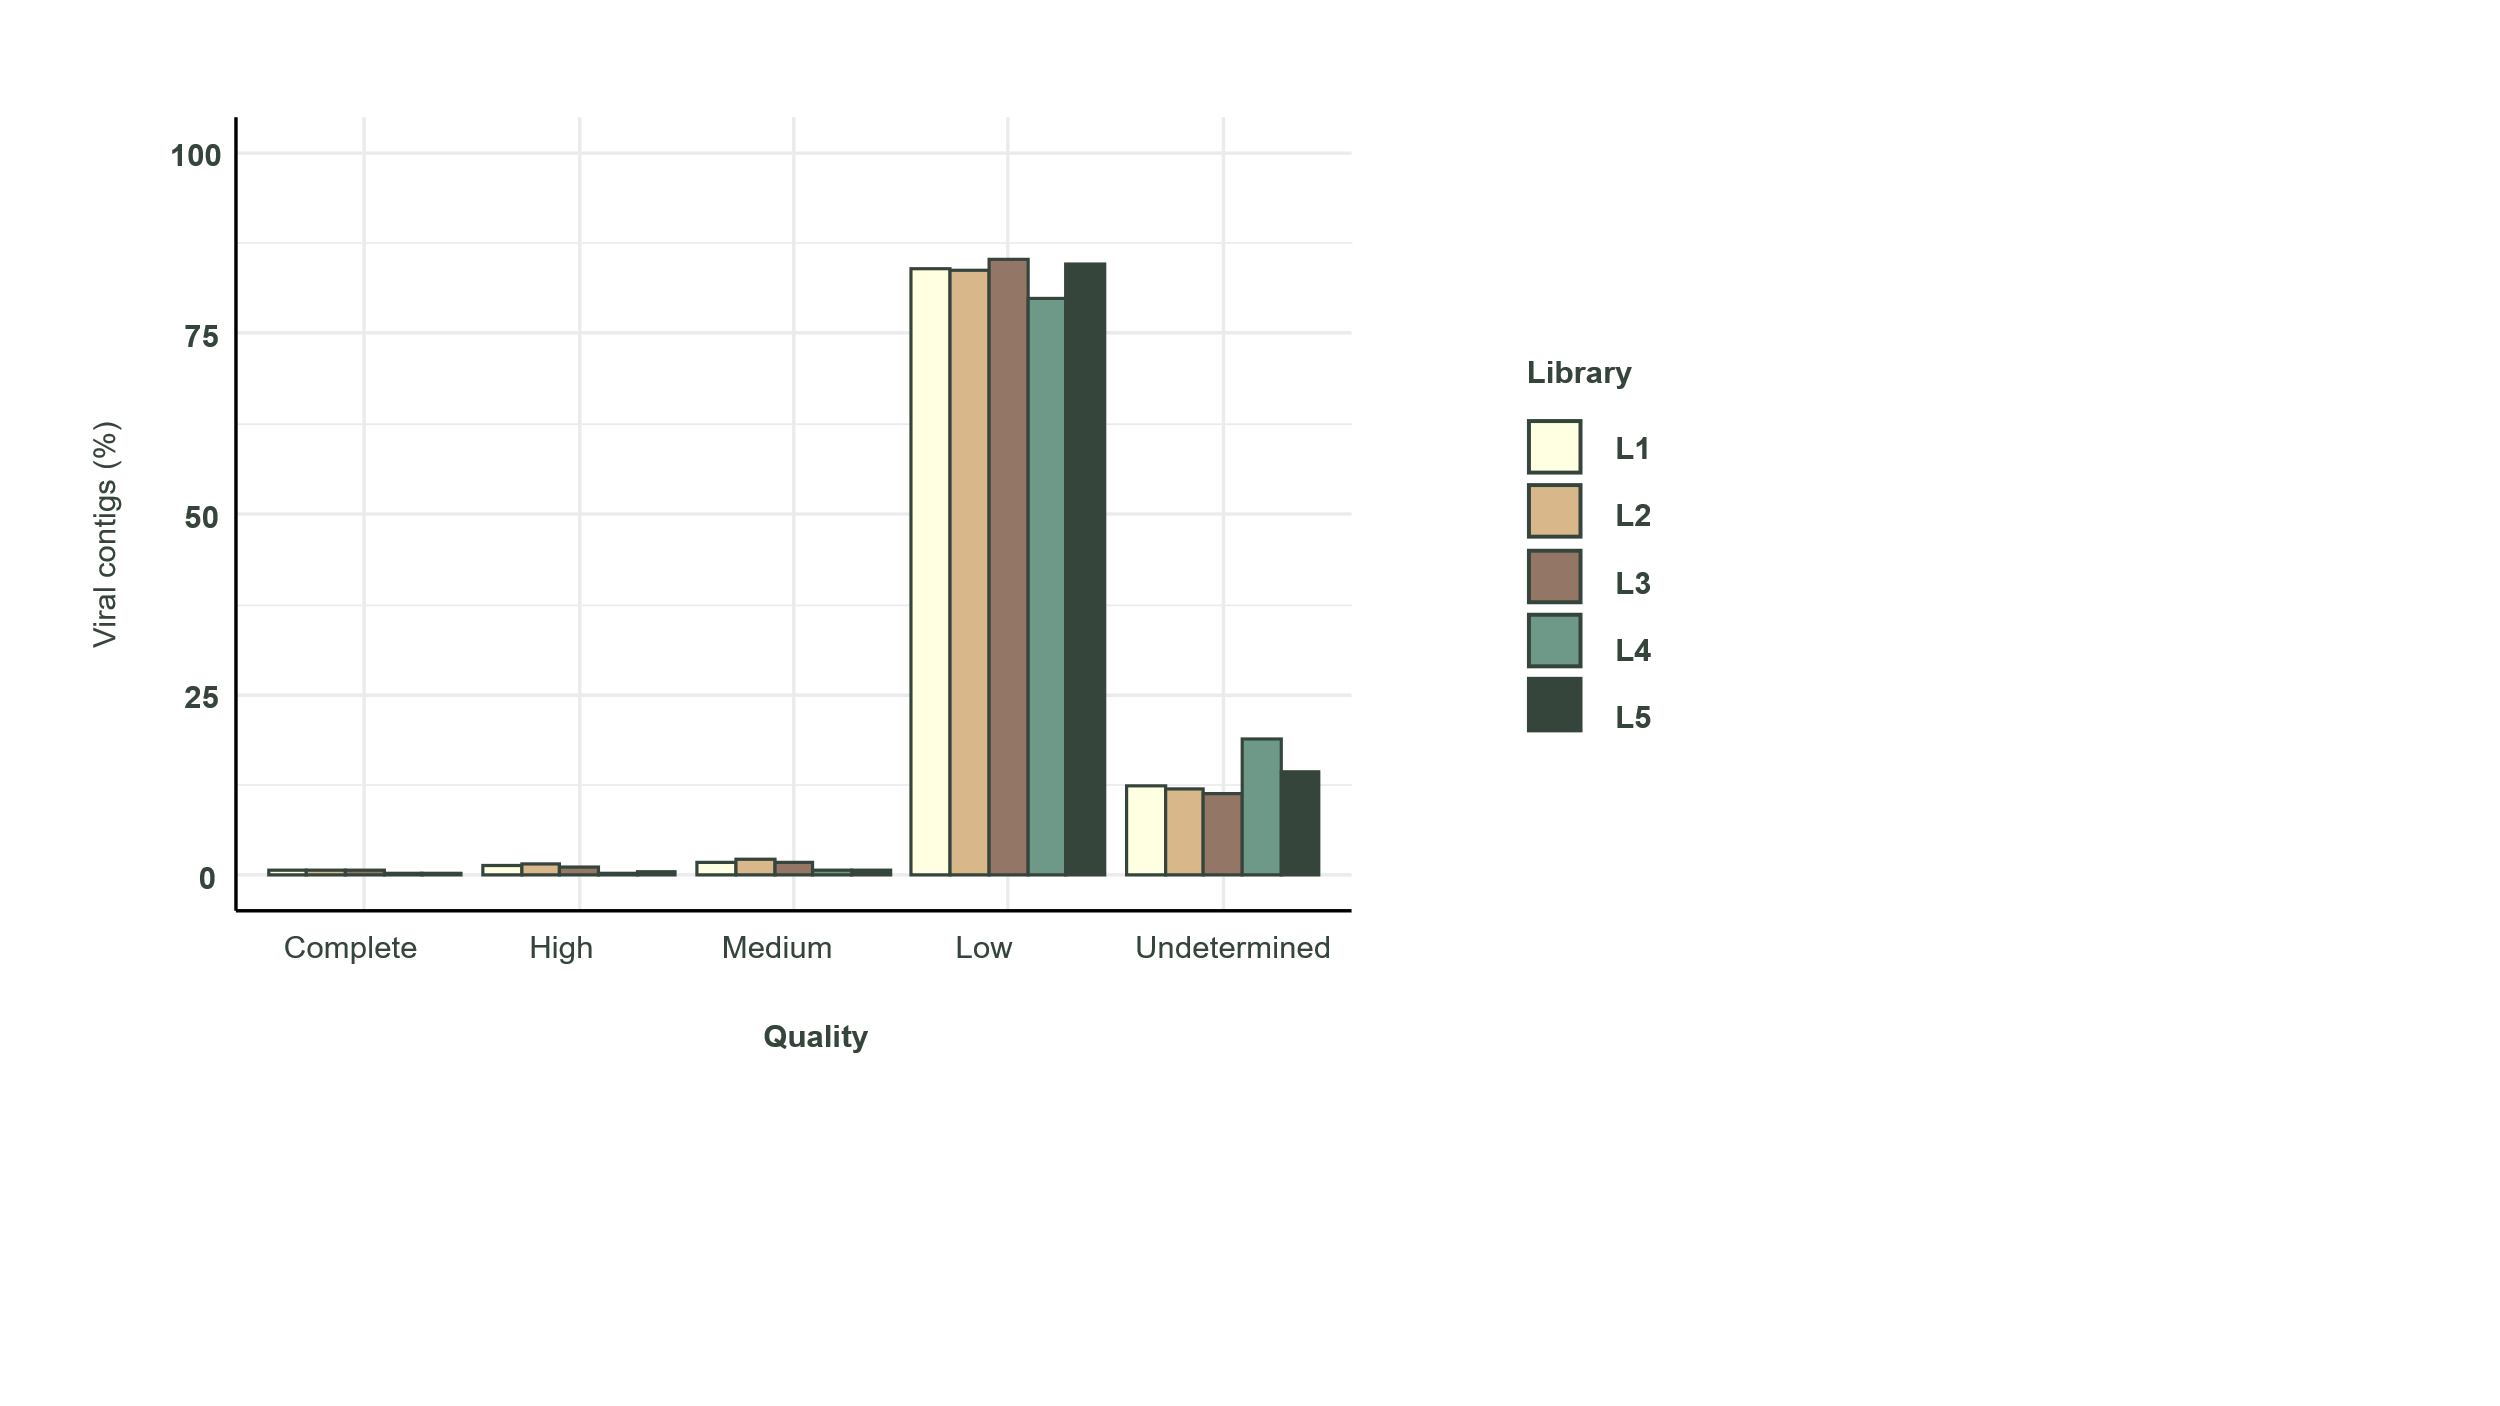


Supplementary Fig. 2. Quality of viral contigs. The quality of viral contigs was estimated using CheckV [5], which classifies contigs according to their estimated viral completeness into complete (100 % complete), high- (>90 % complete), medium- (50–90 %), low- (0–50 %) quality, and not-determined (no completeness information available)


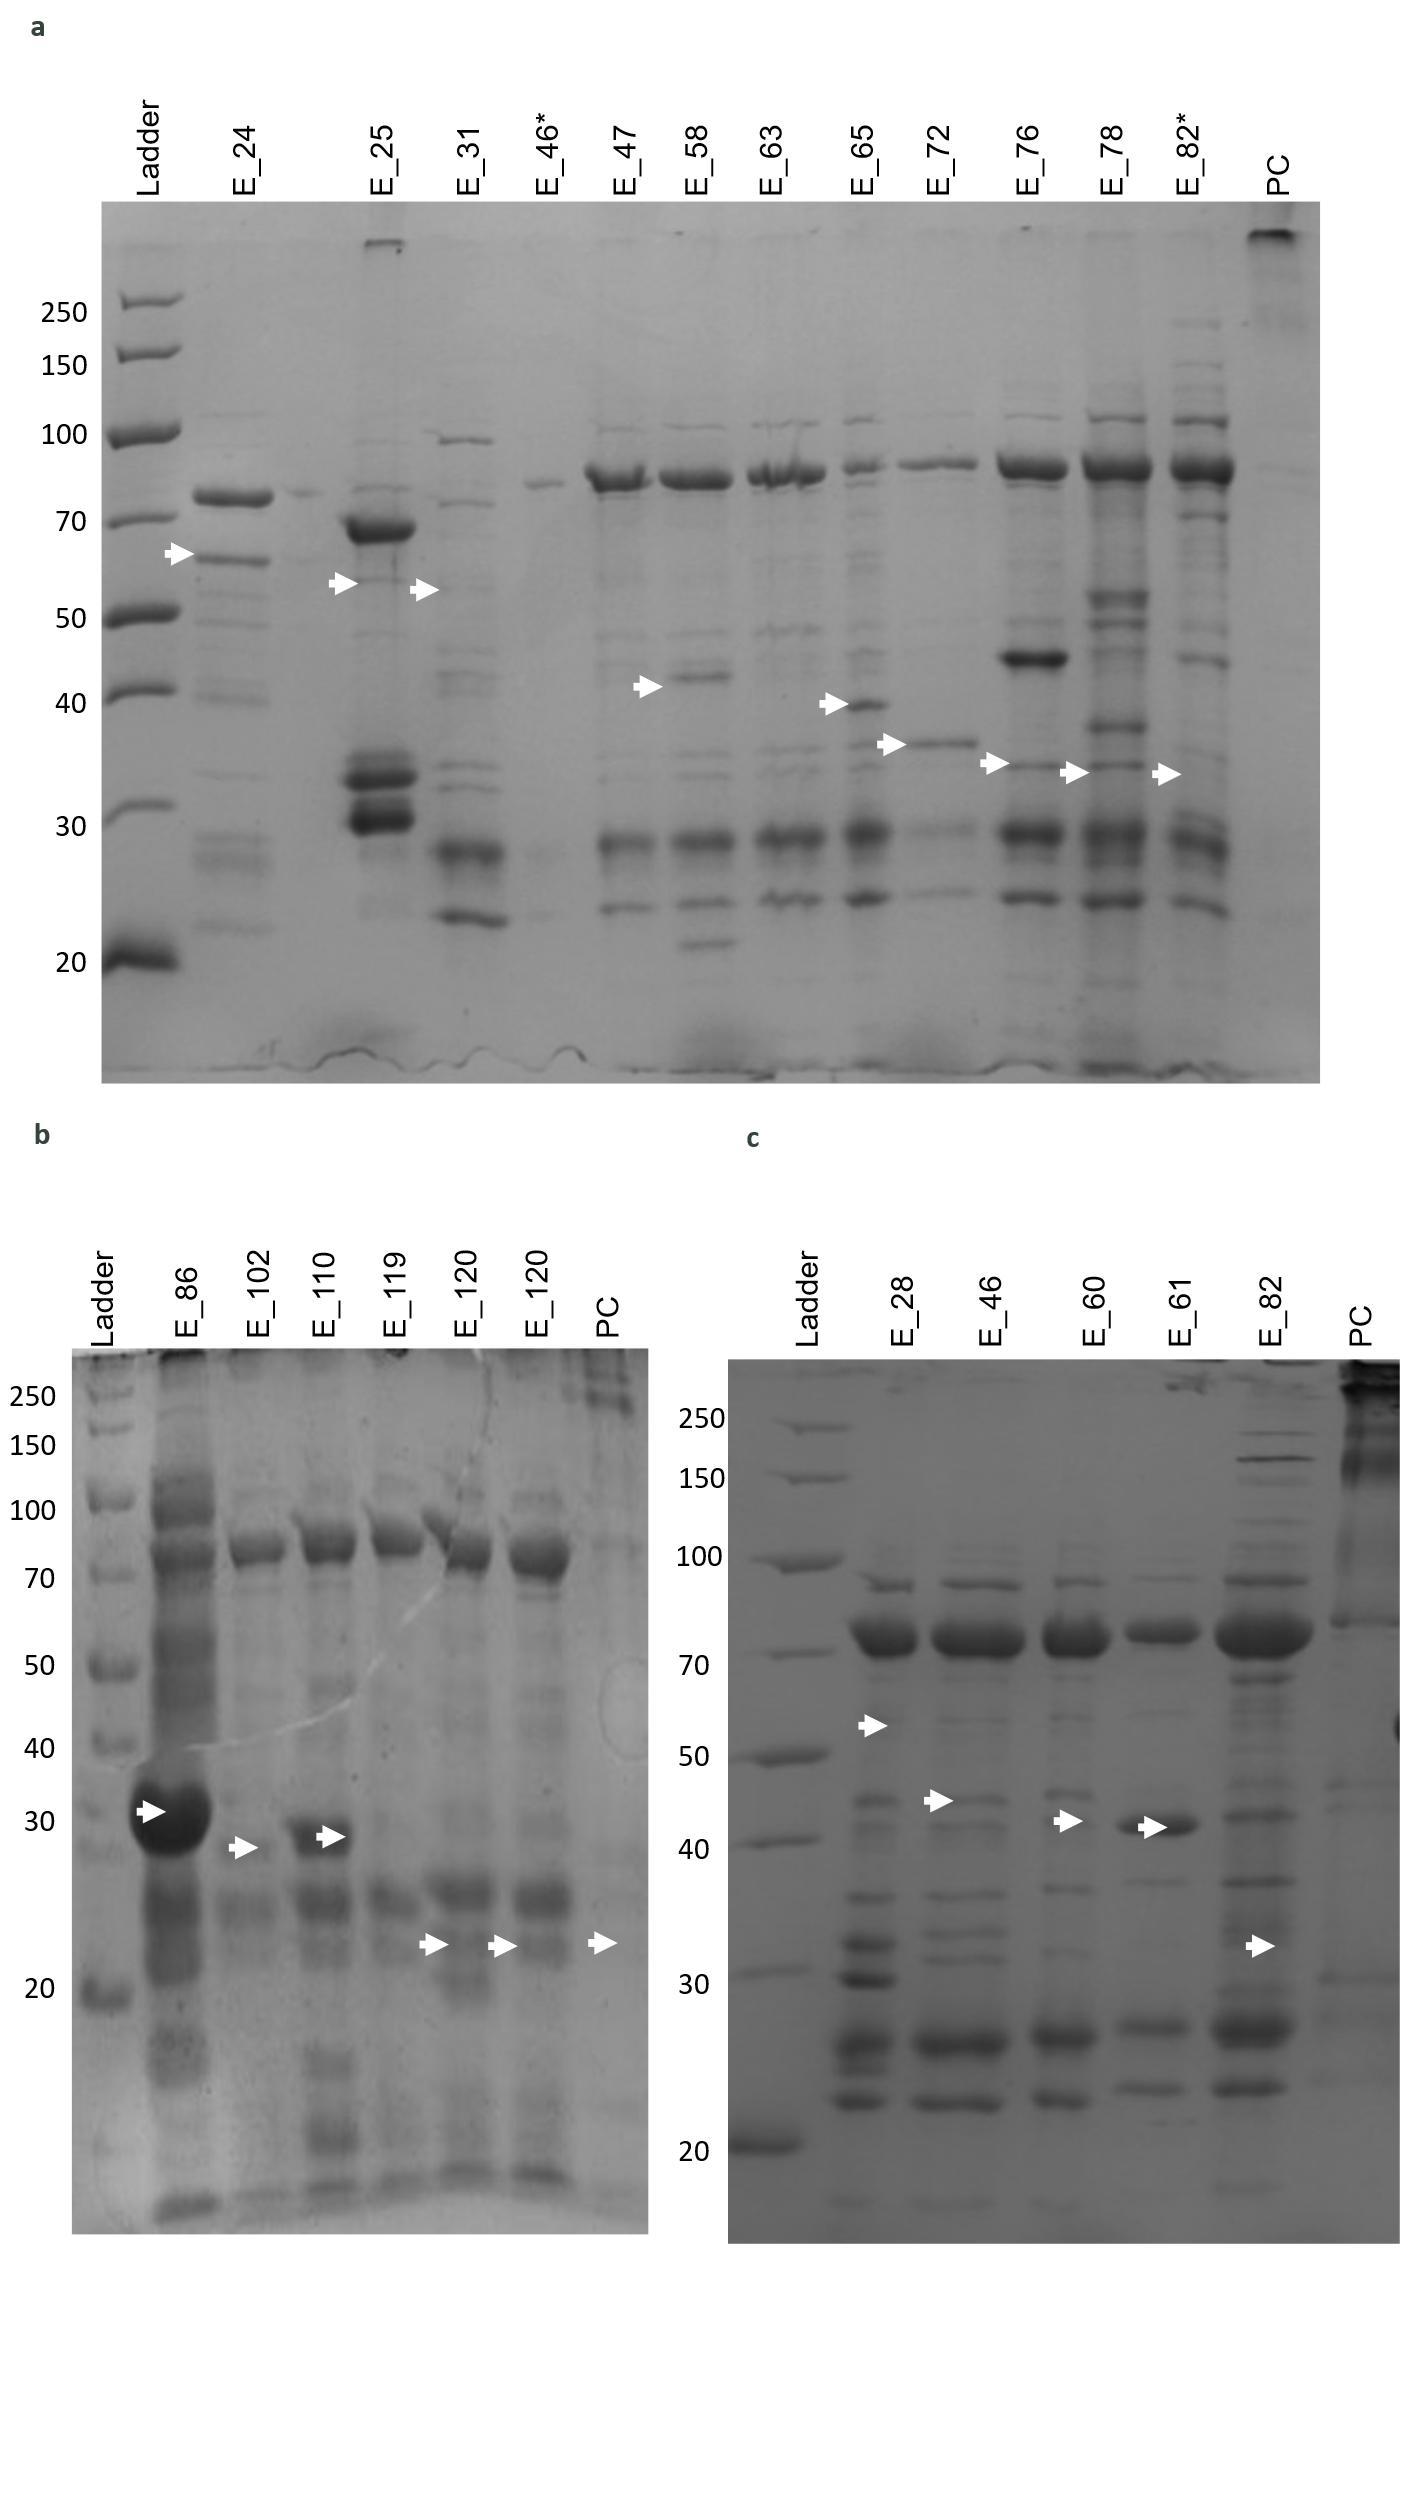


Supplementary Fig. 3. Analysis of enterococcal phage lysins after metal affinity purification via SDS-PAGE. Panels (a), (b), and (c) display SDS-PAGE gels of various protein eluates: panels (a) and (b) illustrate proteins from concurrent expression and purification processes, with the positive control (PC, pLyEF501) from the same expression, shown in two independent SDS-PAGE replicates. Proteins 46 and 82 in panel A, marked with an asterisk (*), were initially purified for assay 1 but were excluded from the final turbidity reduction assay, as they were re-evaluated in assay 2. (c) represents proteins from a second expression and purification process. White arrows indicate the protein band which is expected to be the corresponding protein


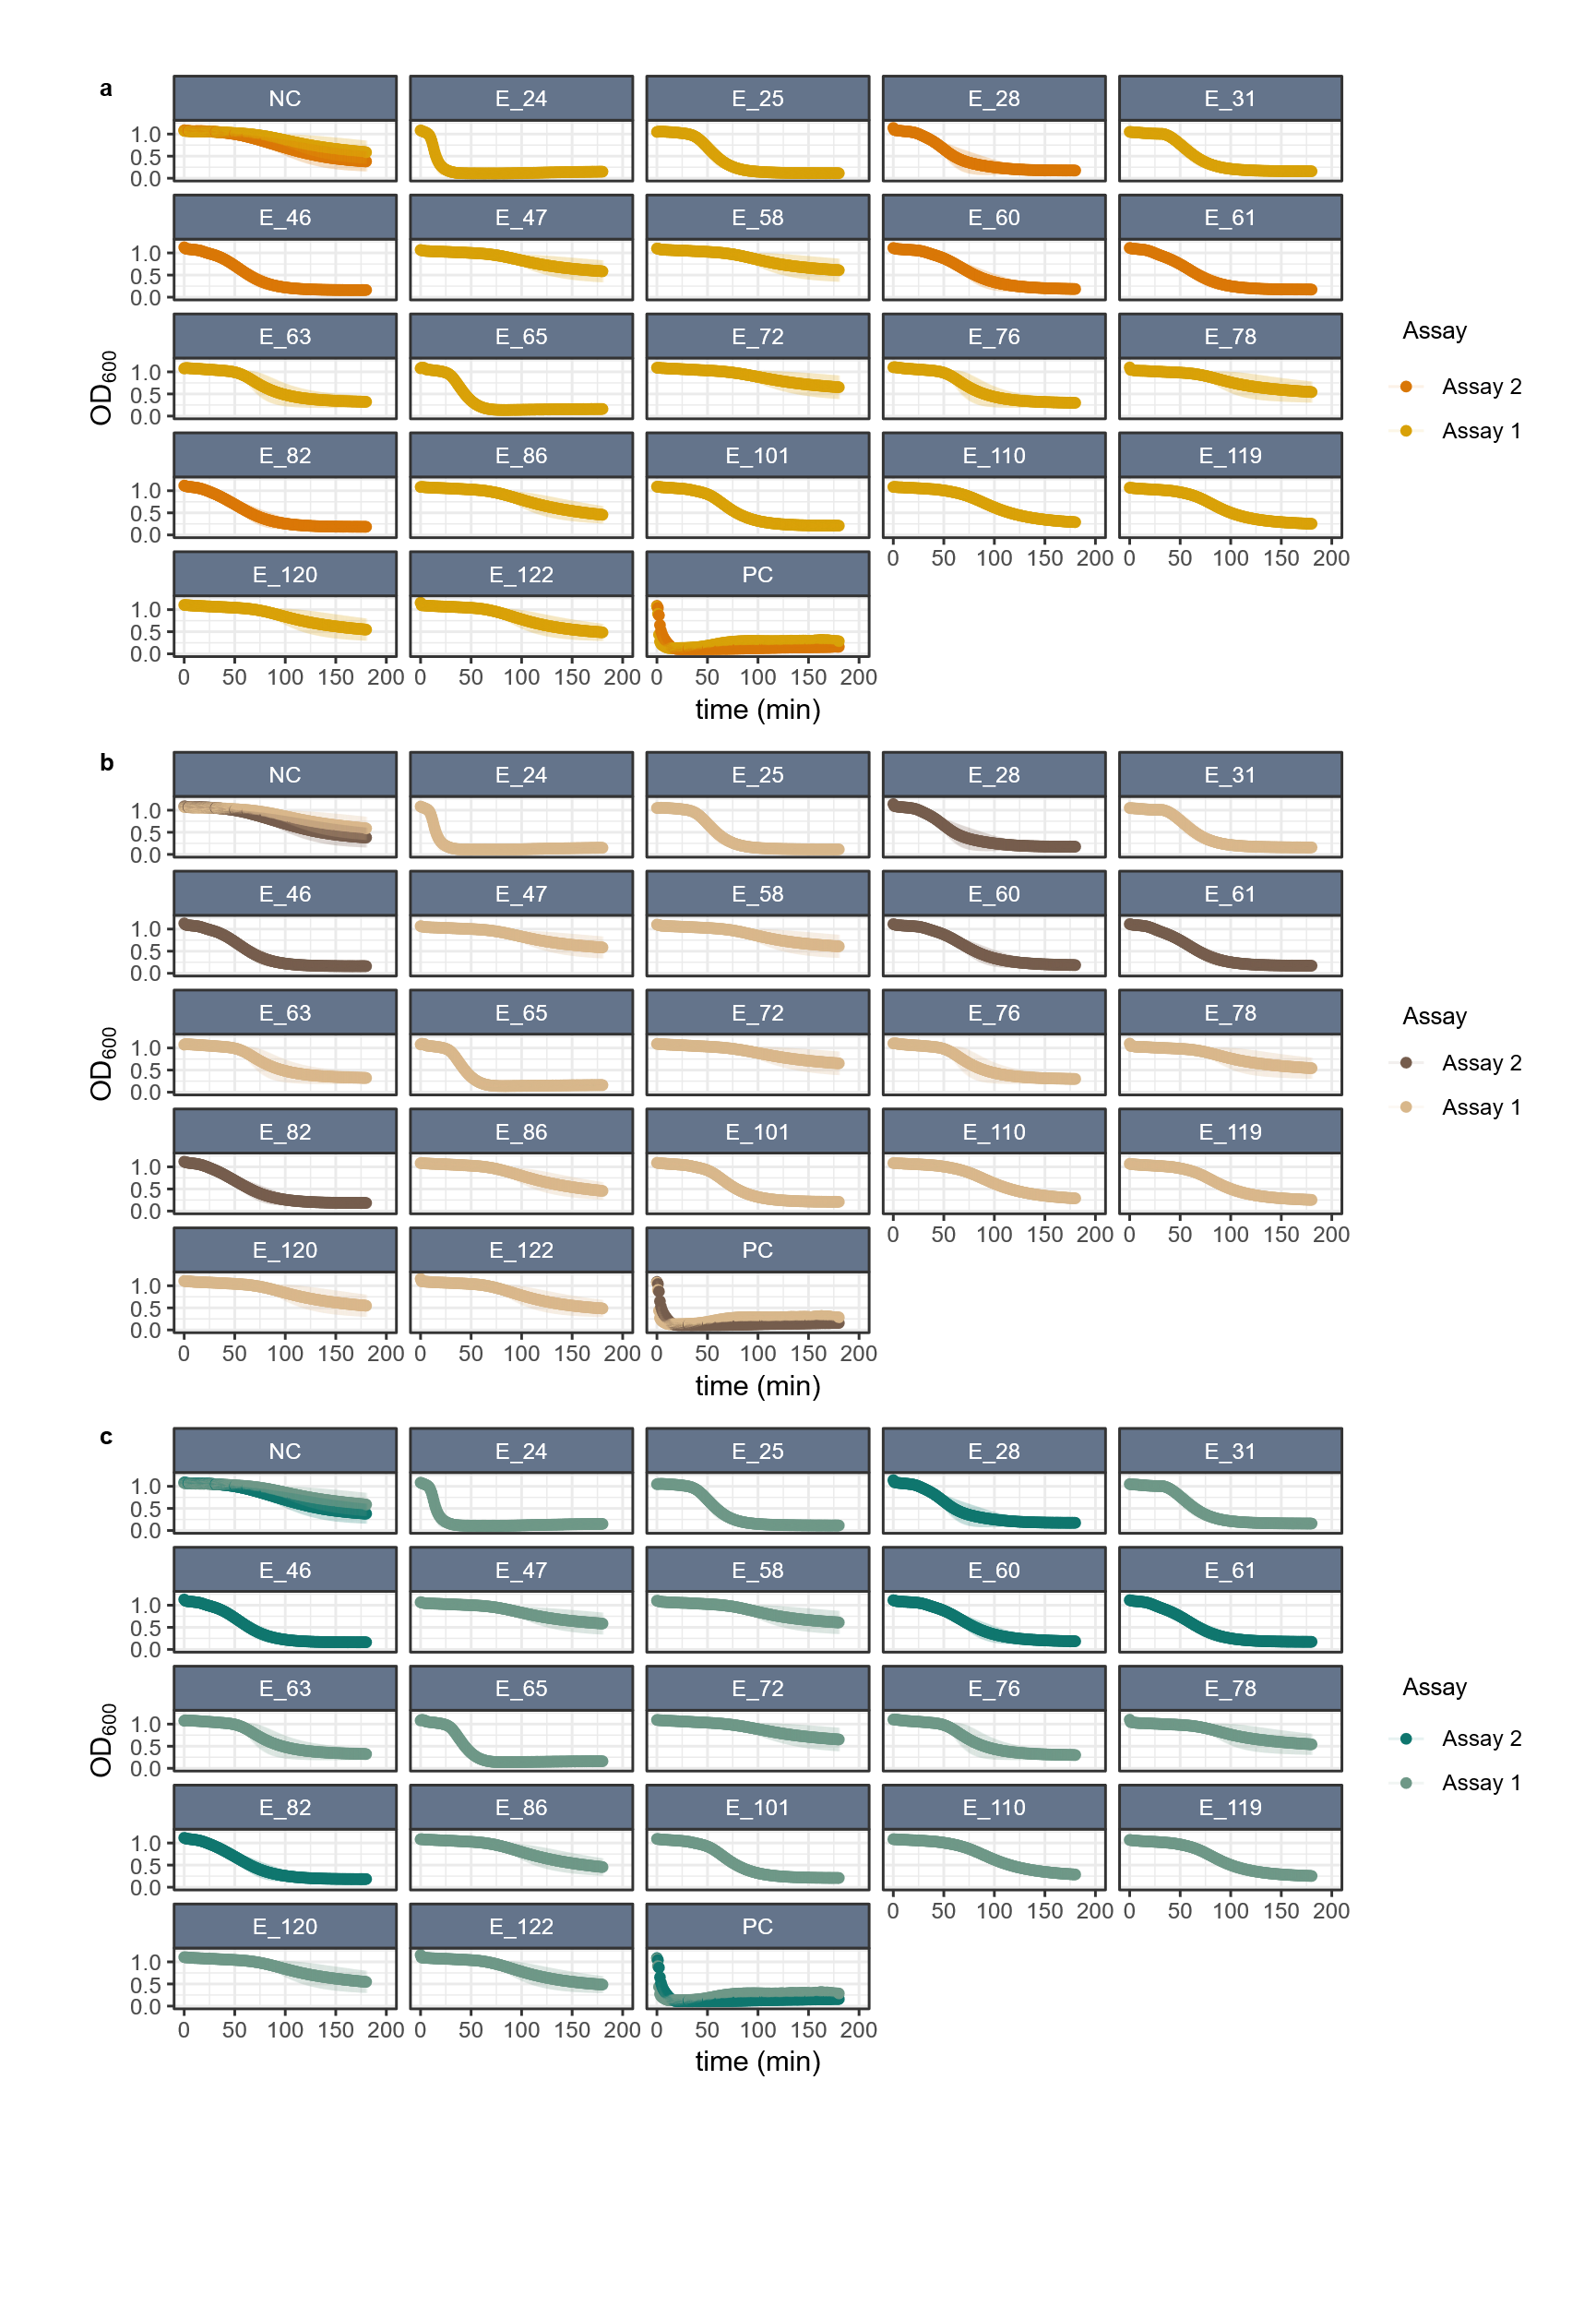
 Supplementary Fig. 4 Turbidity reduction assays against three different enterococci treated with a selection of 21 putative enterococcal phage lysins. The turbidity of the bacterial suspension is expressed as the optical density of the sample at a wavelength of 600 nm (OD600). (a) *E. hirae* ECC1, (b) *E. faecium* AW3576, (c) *E. faecalis* NJ-3. Some proteins (E_28, E_46, E_60, E_61, E_82) were expressed and tested in separate assays along with the negative (NC) and positive controls (PC), colored accordingly. Each dot represents the average of three biological replicates, the standard deviation is represented as transparent bars

# Bibliography supplementary information

1. Criel, B., Taelman, S., Van Criekinge, W., Stock, M., & Briers, Y. (2021). PhaLP: A Database for the Study of Phage Lytic Proteins and Their Evolution. Viruses-Basel*,* 13(7). <https://doi.org/10.3390/v13071240>.

2. Jones, P., Binns, D., Chang, H. Y., Fraser, M., Li, W. Z., McAnulla, C., et al. (2014). InterProScan 5: genome-scale protein function classification. Bioinformatics*,* 30(9):1236-1240. <https://doi.org/10.1093/bioinformatics/btu031>.

3. Abramson, J., Adler, J., Dunger, J., Evans, R., Green, T., Pritzel, A., et al. (2024). Accurate structure prediction of biomolecular interactions with AlphaFold 3. Nature*,* 630(8016):493-500. 10.1038/s41586-024-07487-w.

4. Boulay, A., Cremelie, E., Galiez, C., Briers, Y., Rousseau, E., & Vázquez, R. (2025). SPAED: harnessing AlphaFold output for accurate segmentation of phage endolysin domains. Bioinformatics*,* 41(10). <https://doi.org/10.1093/bioinformatics/btaf531>.

5. Nayfach, S., Camargo, A. P., Schulz, F., Eloe-Fadrosh, E., Roux, S., & Kyrpides, N. C. (2021). CheckV assesses the quality and completeness of metagenome-assembled viral genomes. Nature Biotechnology*,* 39(5):578-+. <https://doi.org/10.1038/s41587-020-00774-7>.
